# Supplementary material for: Analysis of wild-species introgressions in tomato inbreds uncovers ancestral origins
Source: PubMed Central journal article supplement (PMC4219026; doi:10.1186/s12870-014-0287-2), 2014-10-28

# Chromosome 1

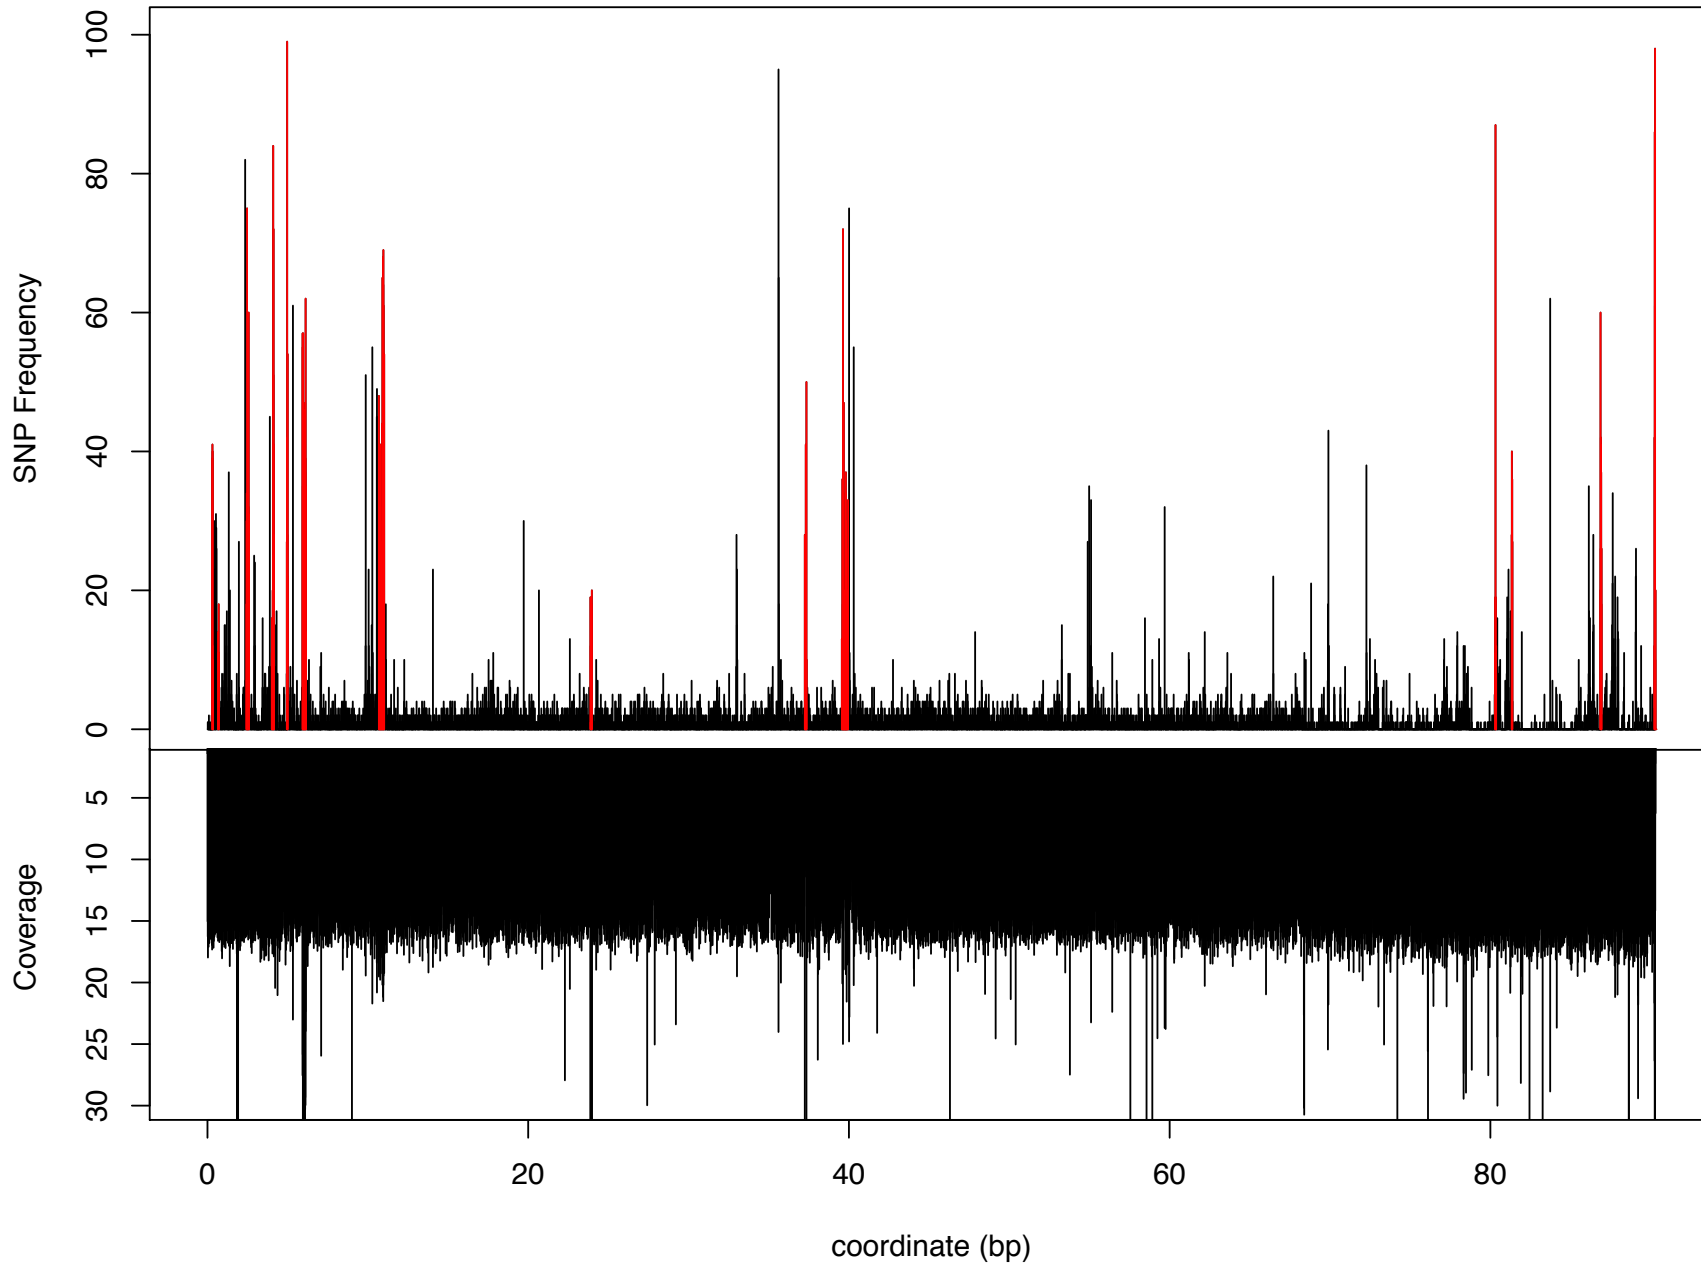

# Chromosome 2

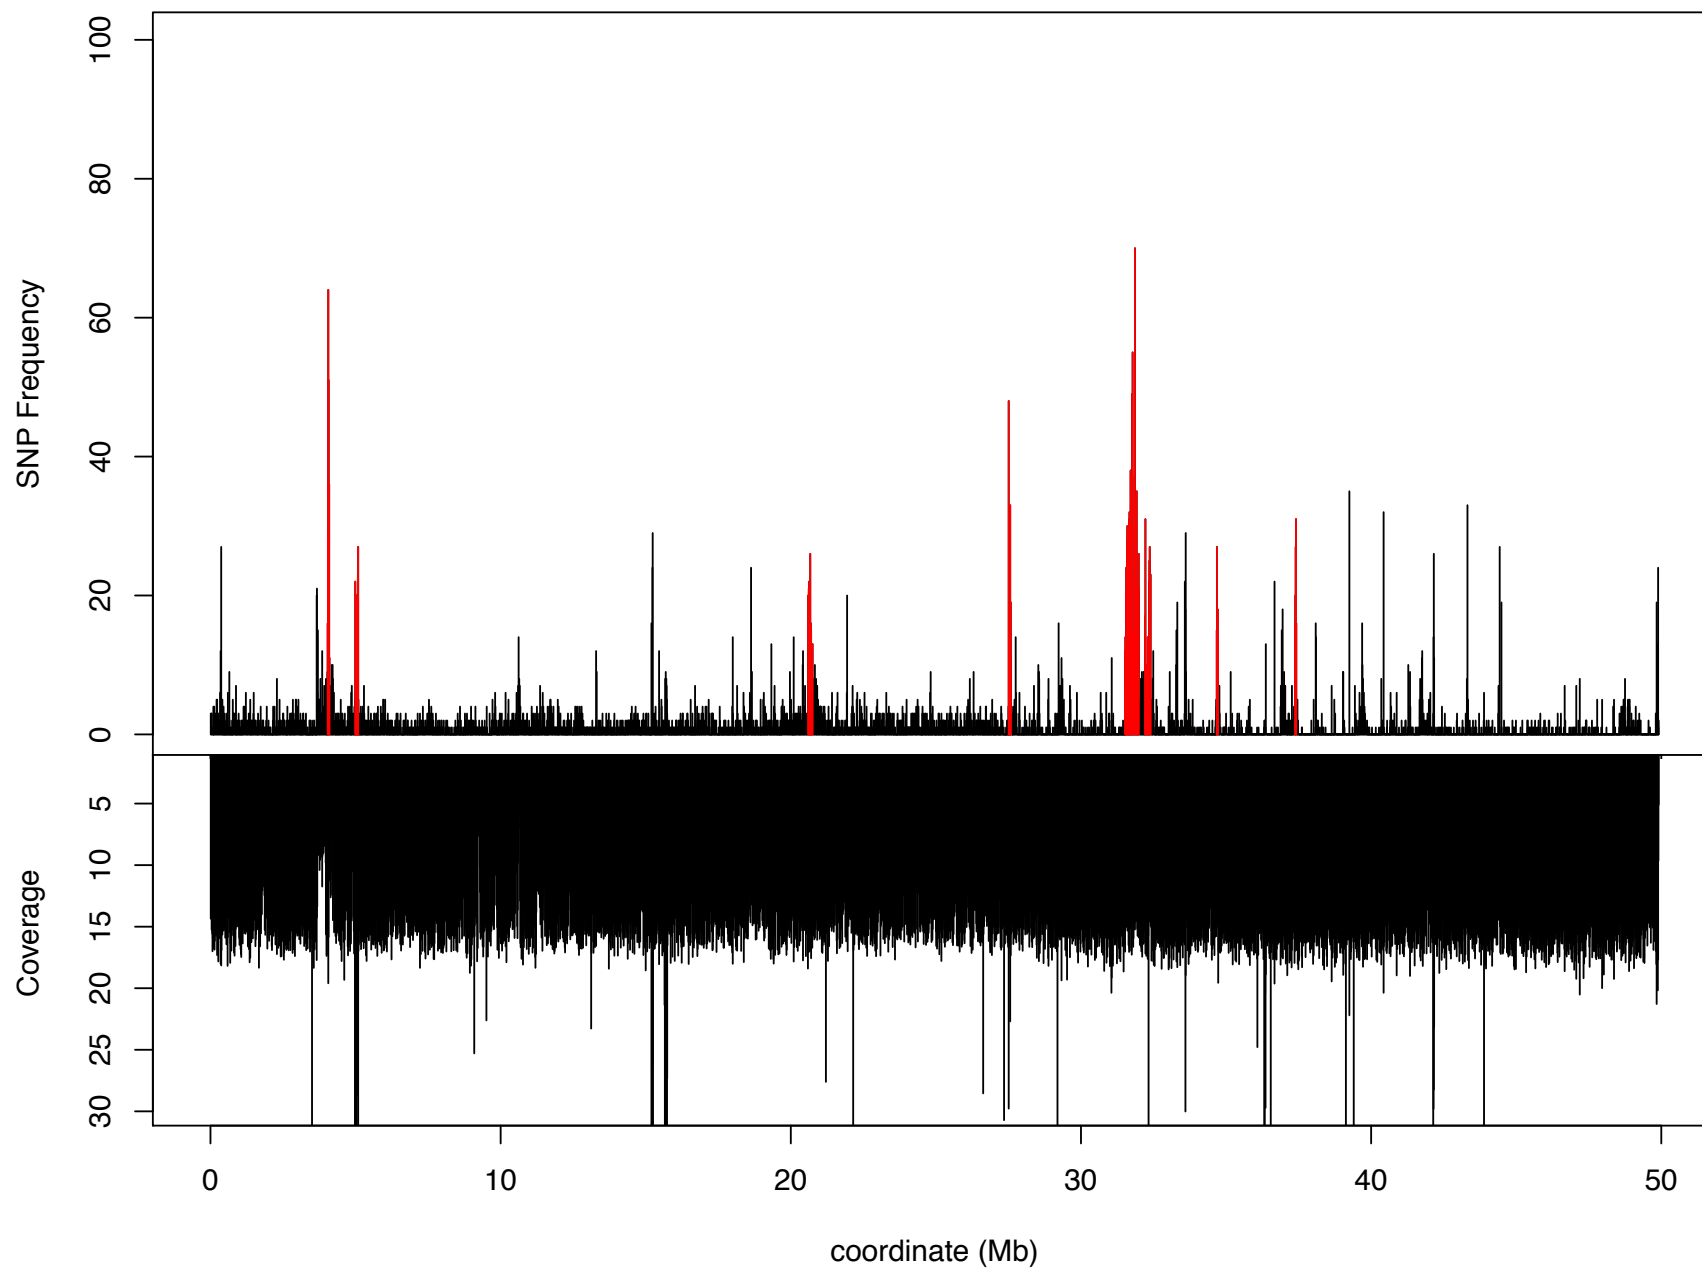

# Chromosome 3

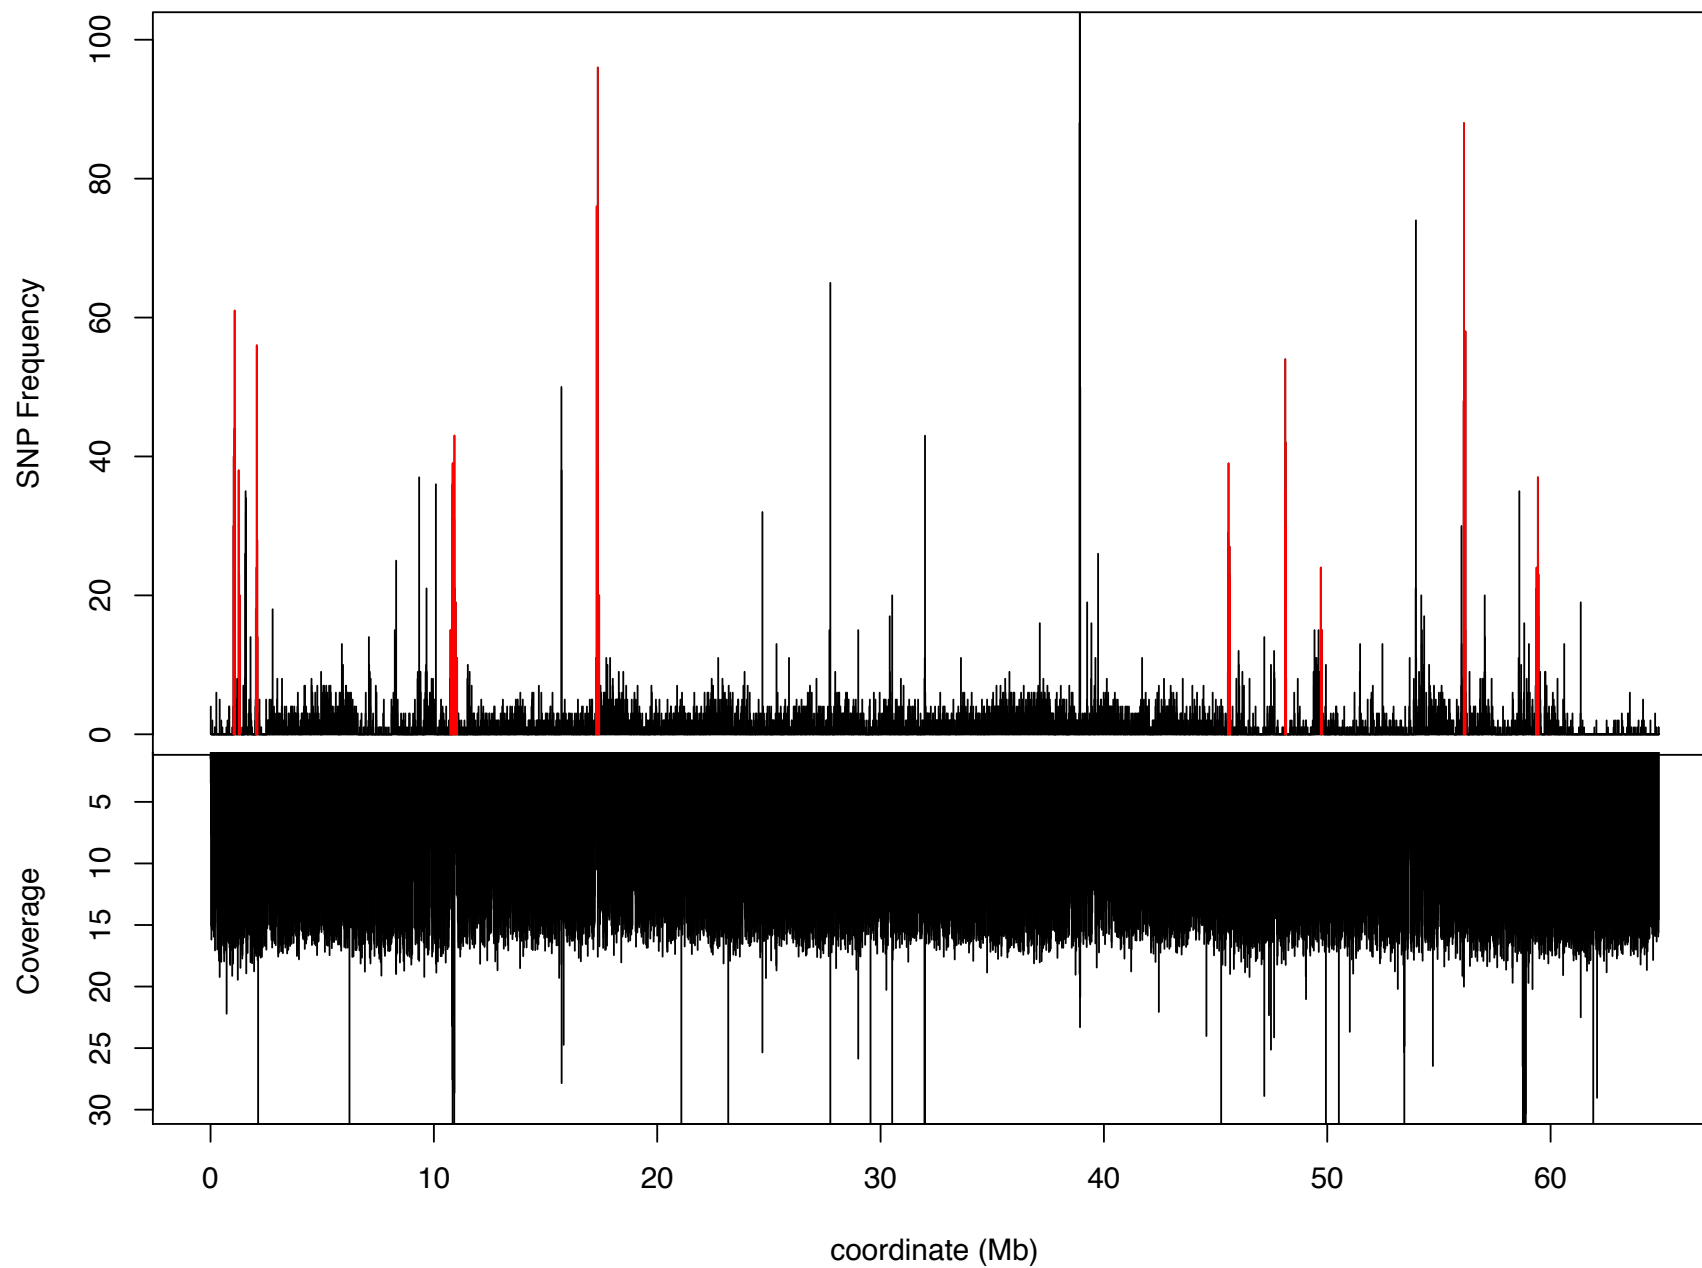

# Chromosome 4

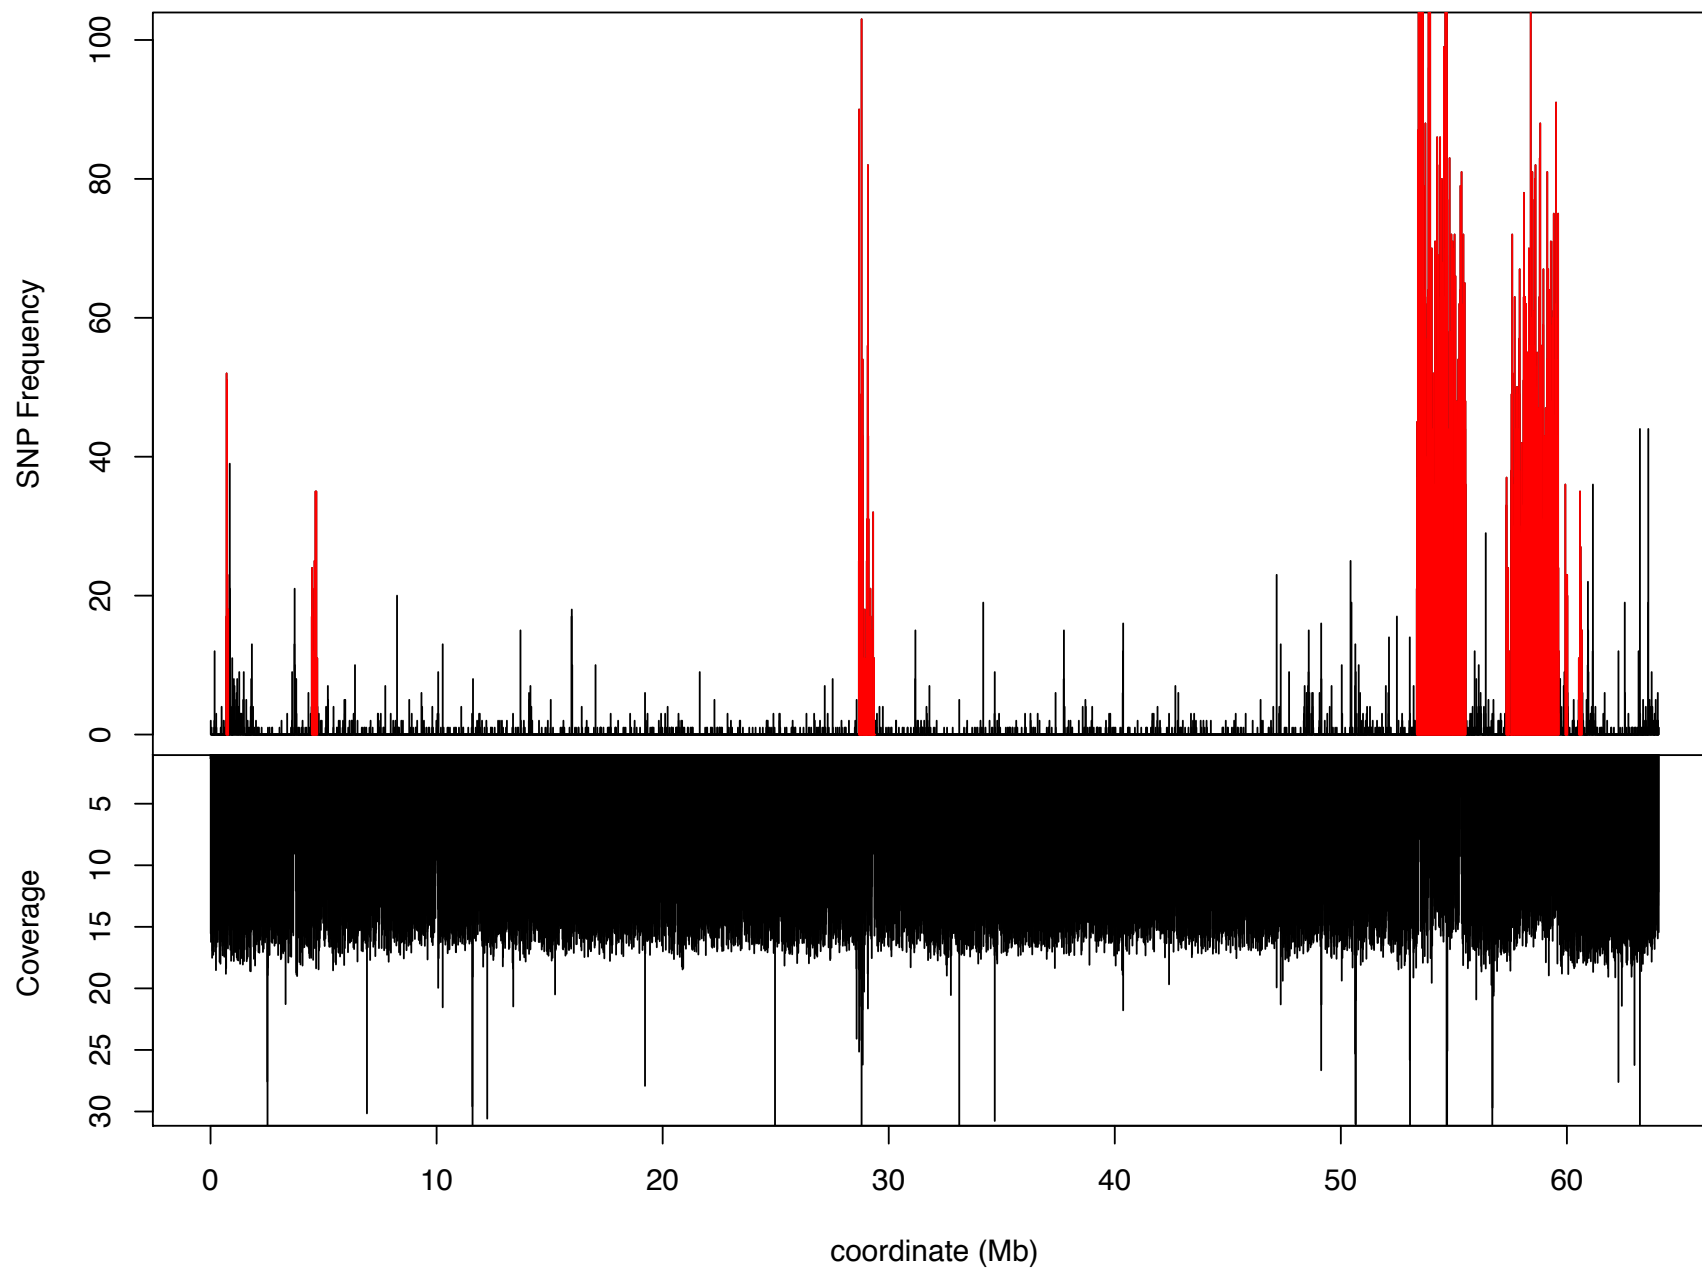

# Chromosome 5

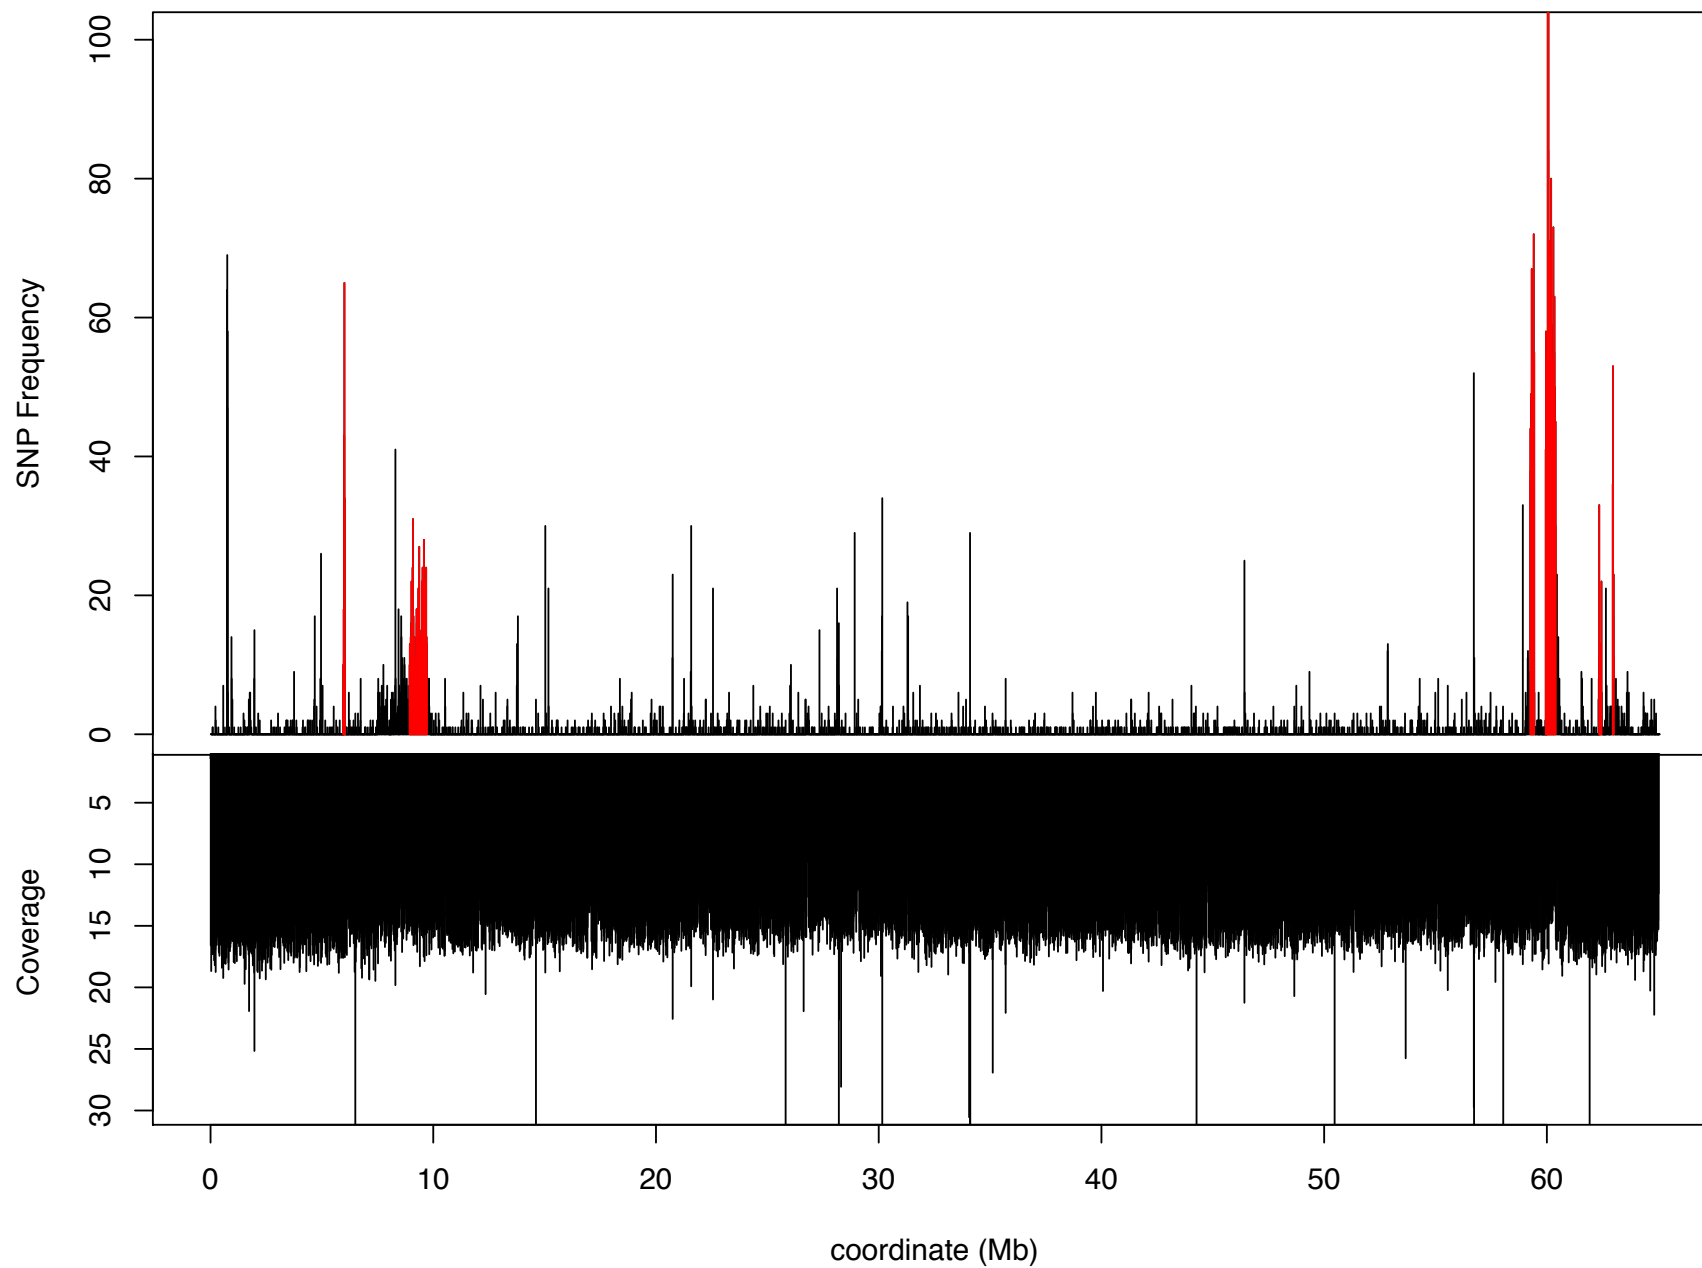

# Chromosome 6

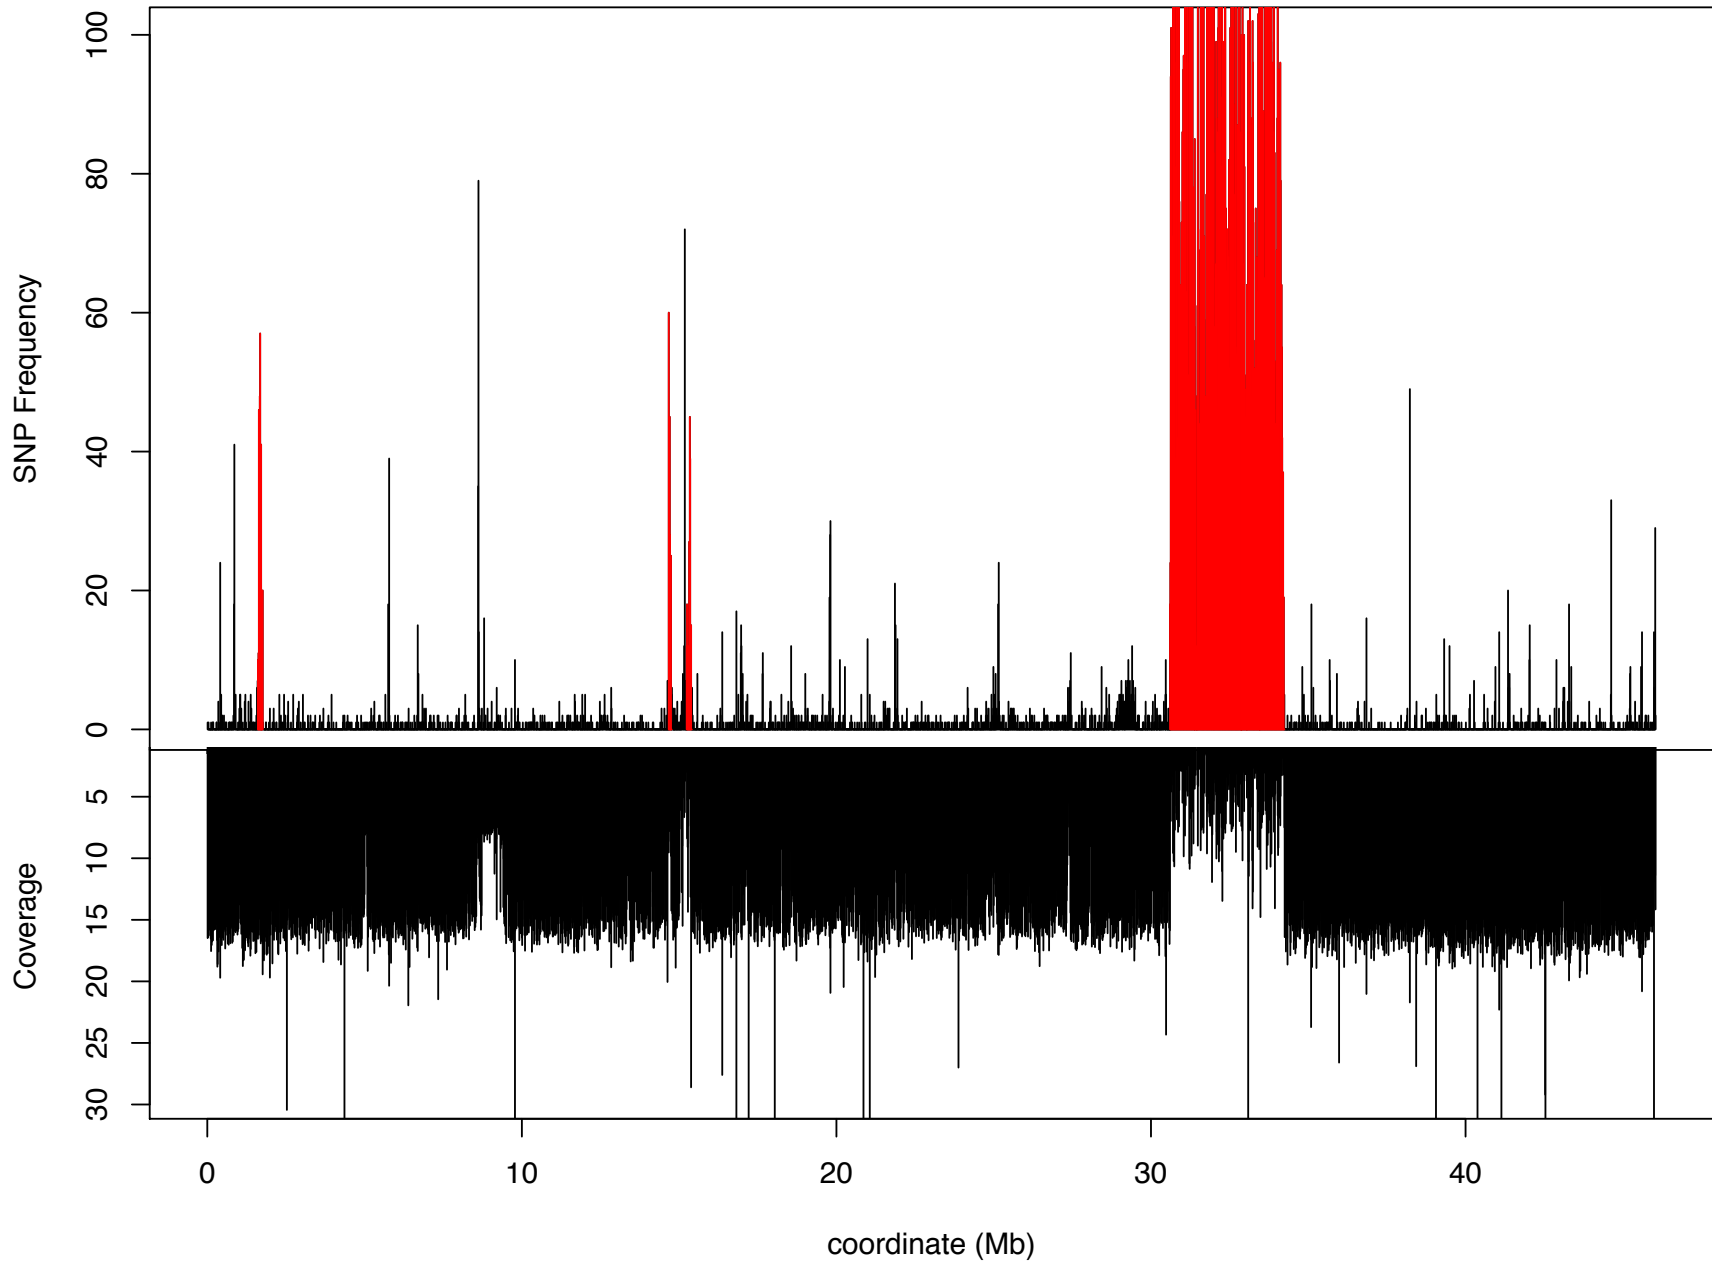

# Chromosome 7

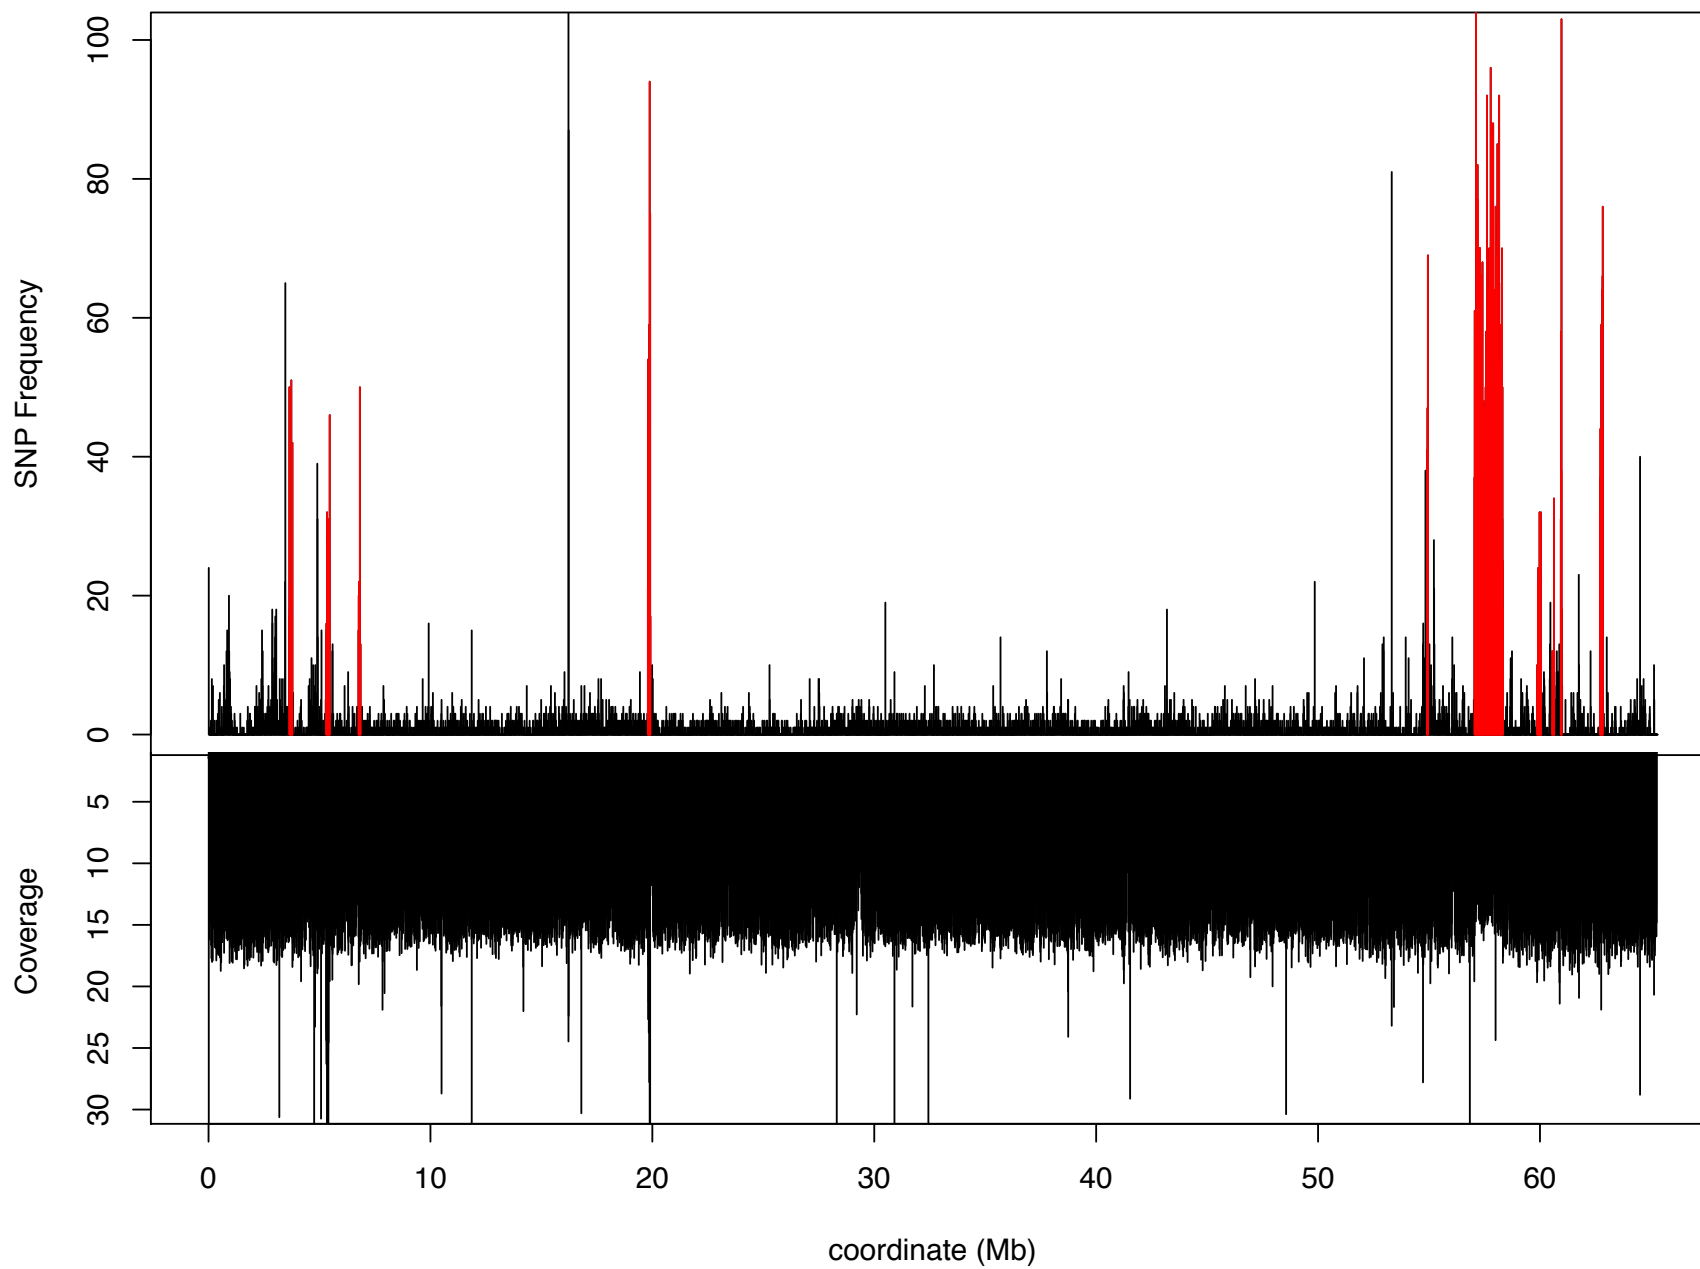

# Chromosome 8

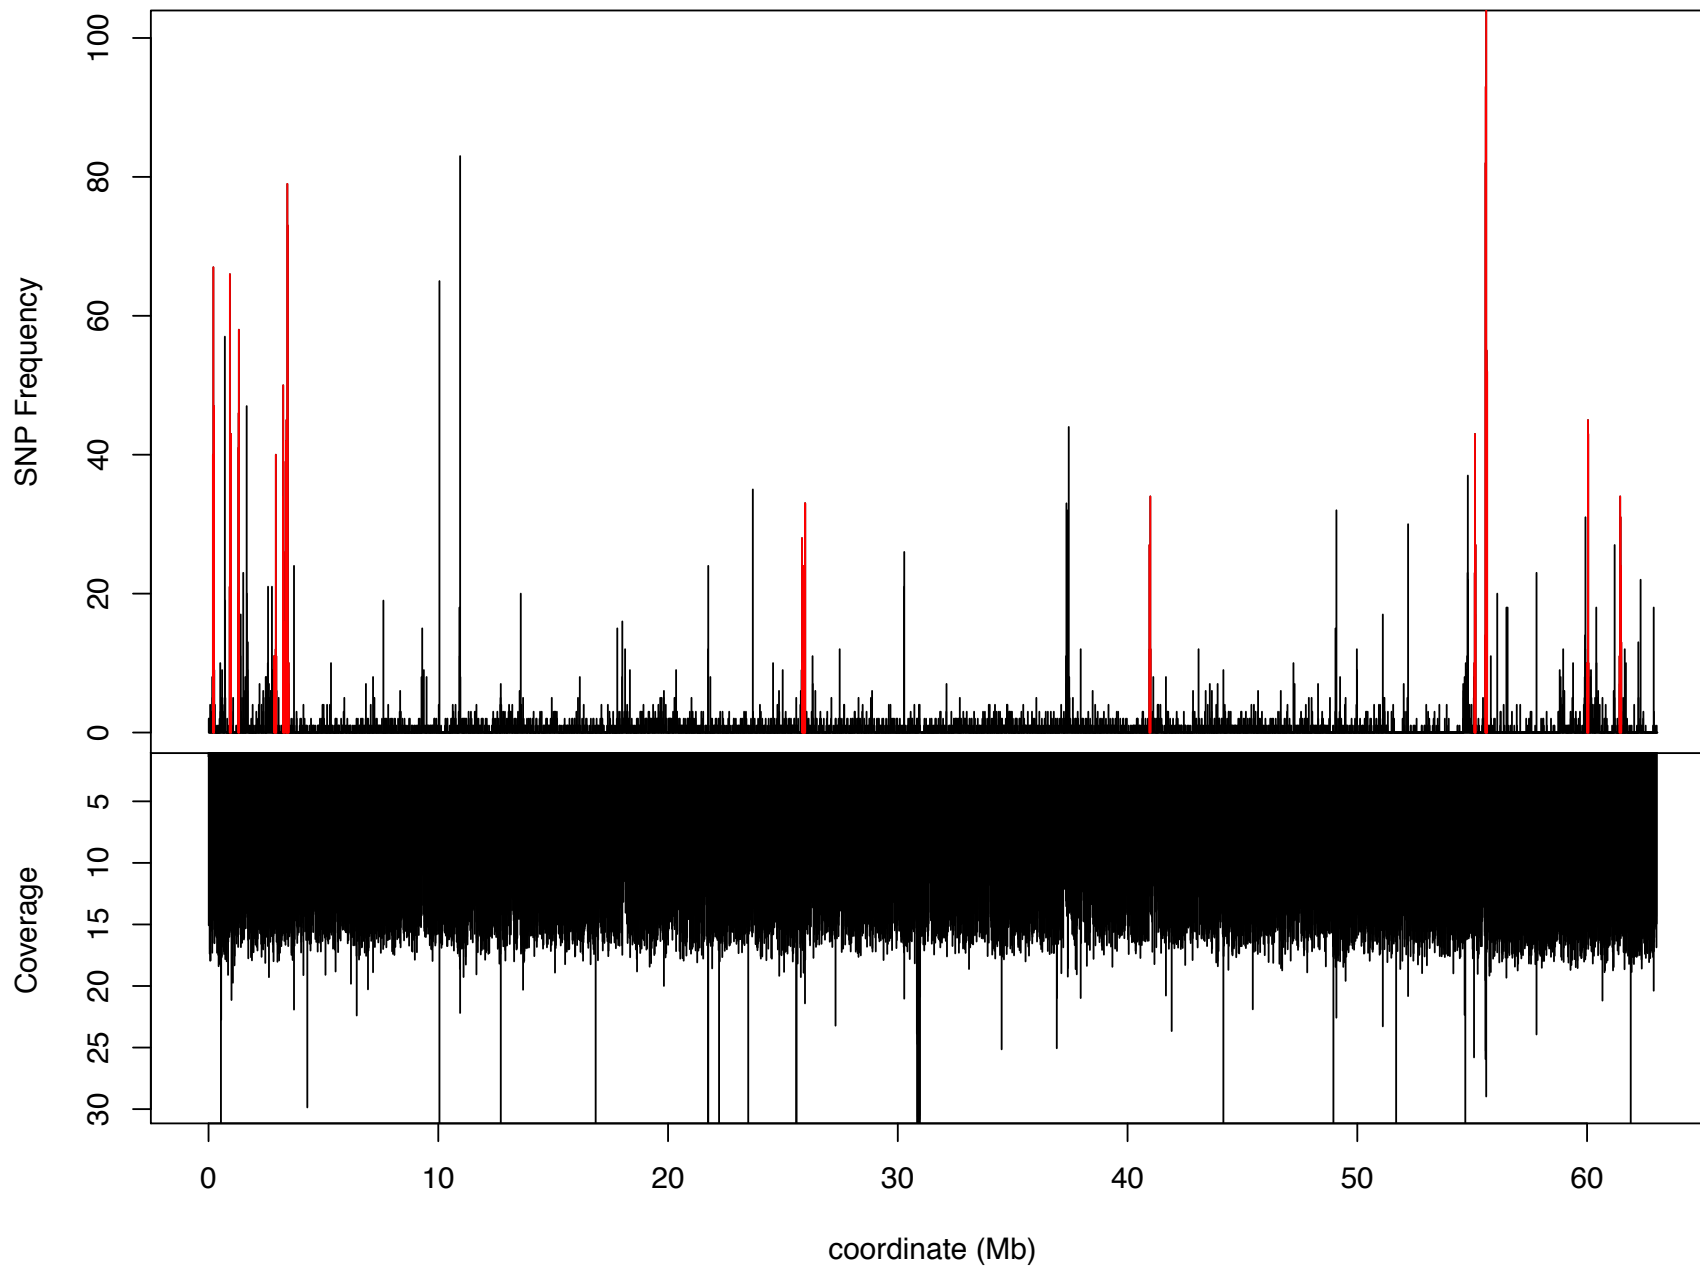



# Chromosome 9

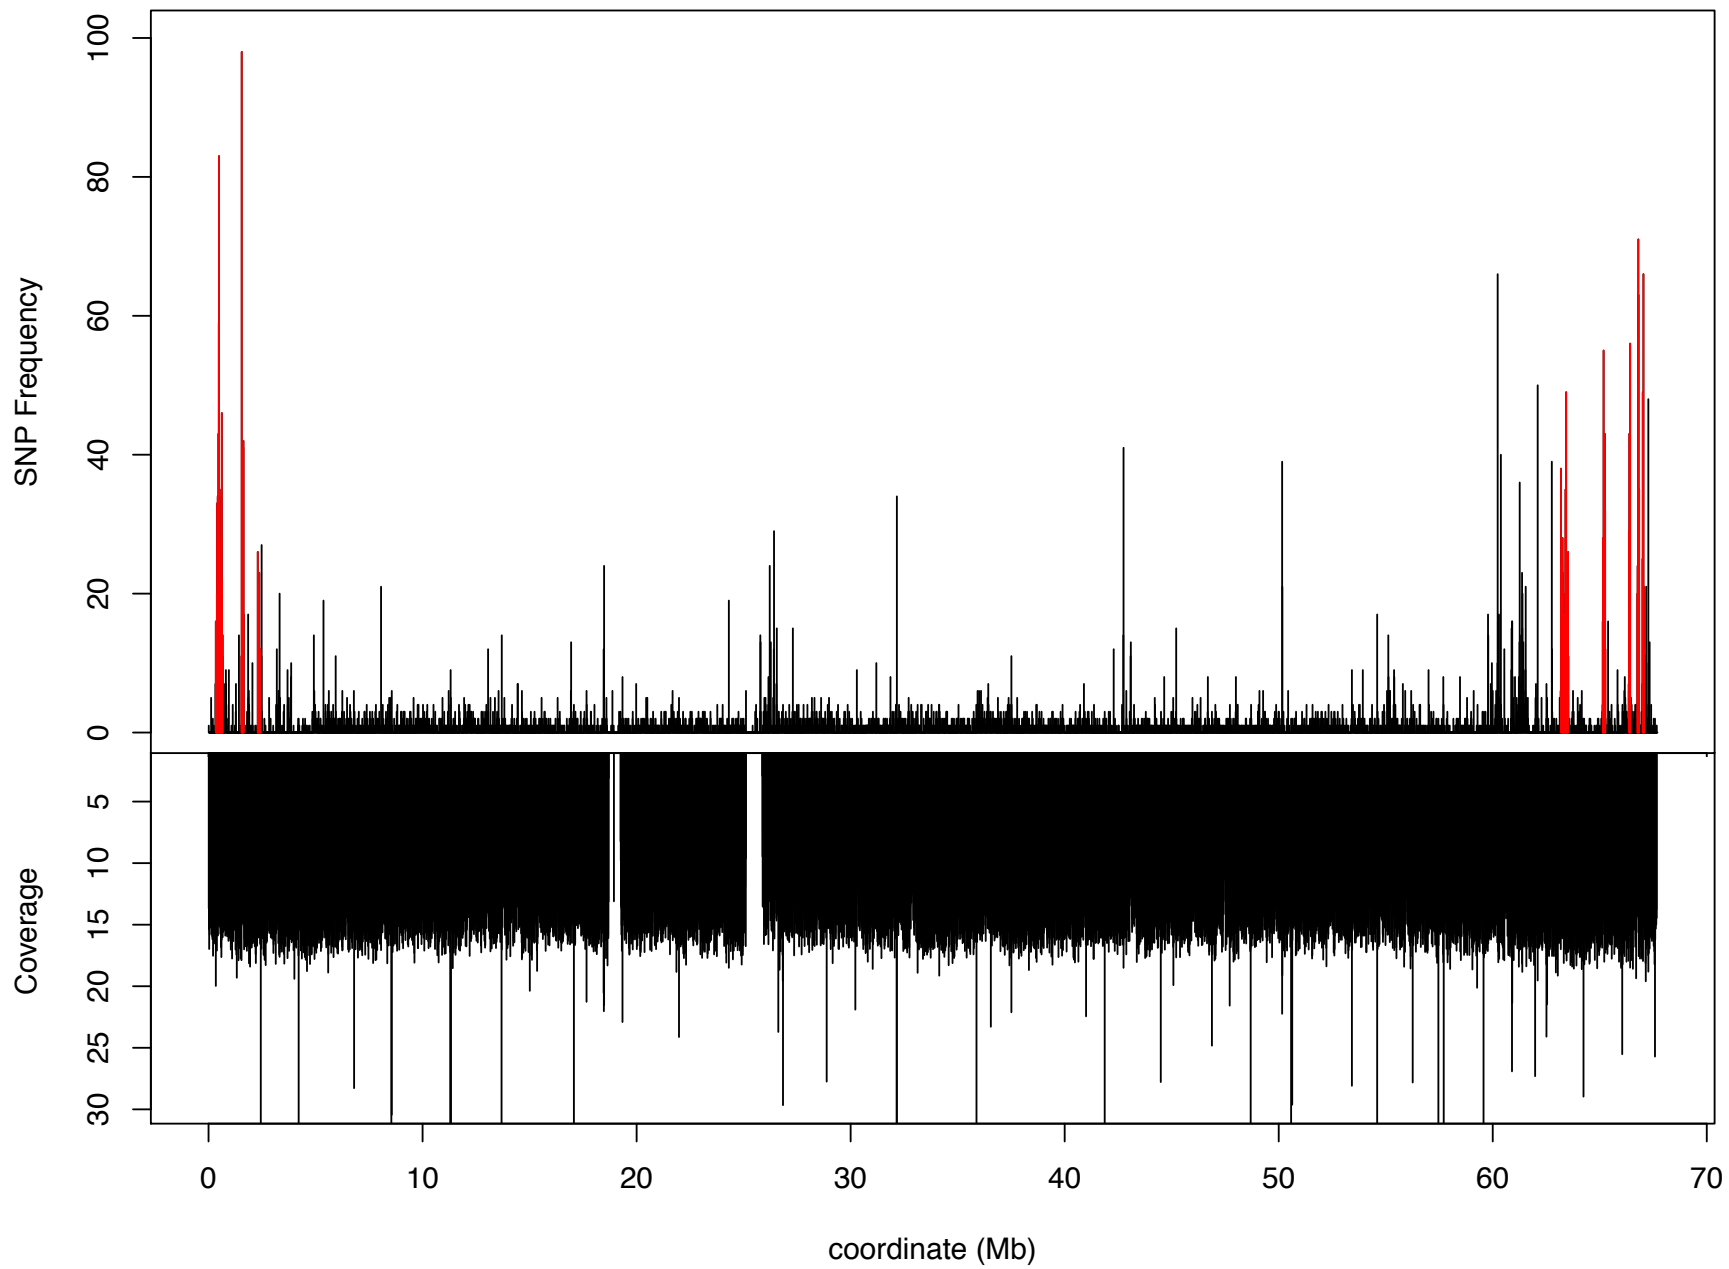

# Chromosome 10

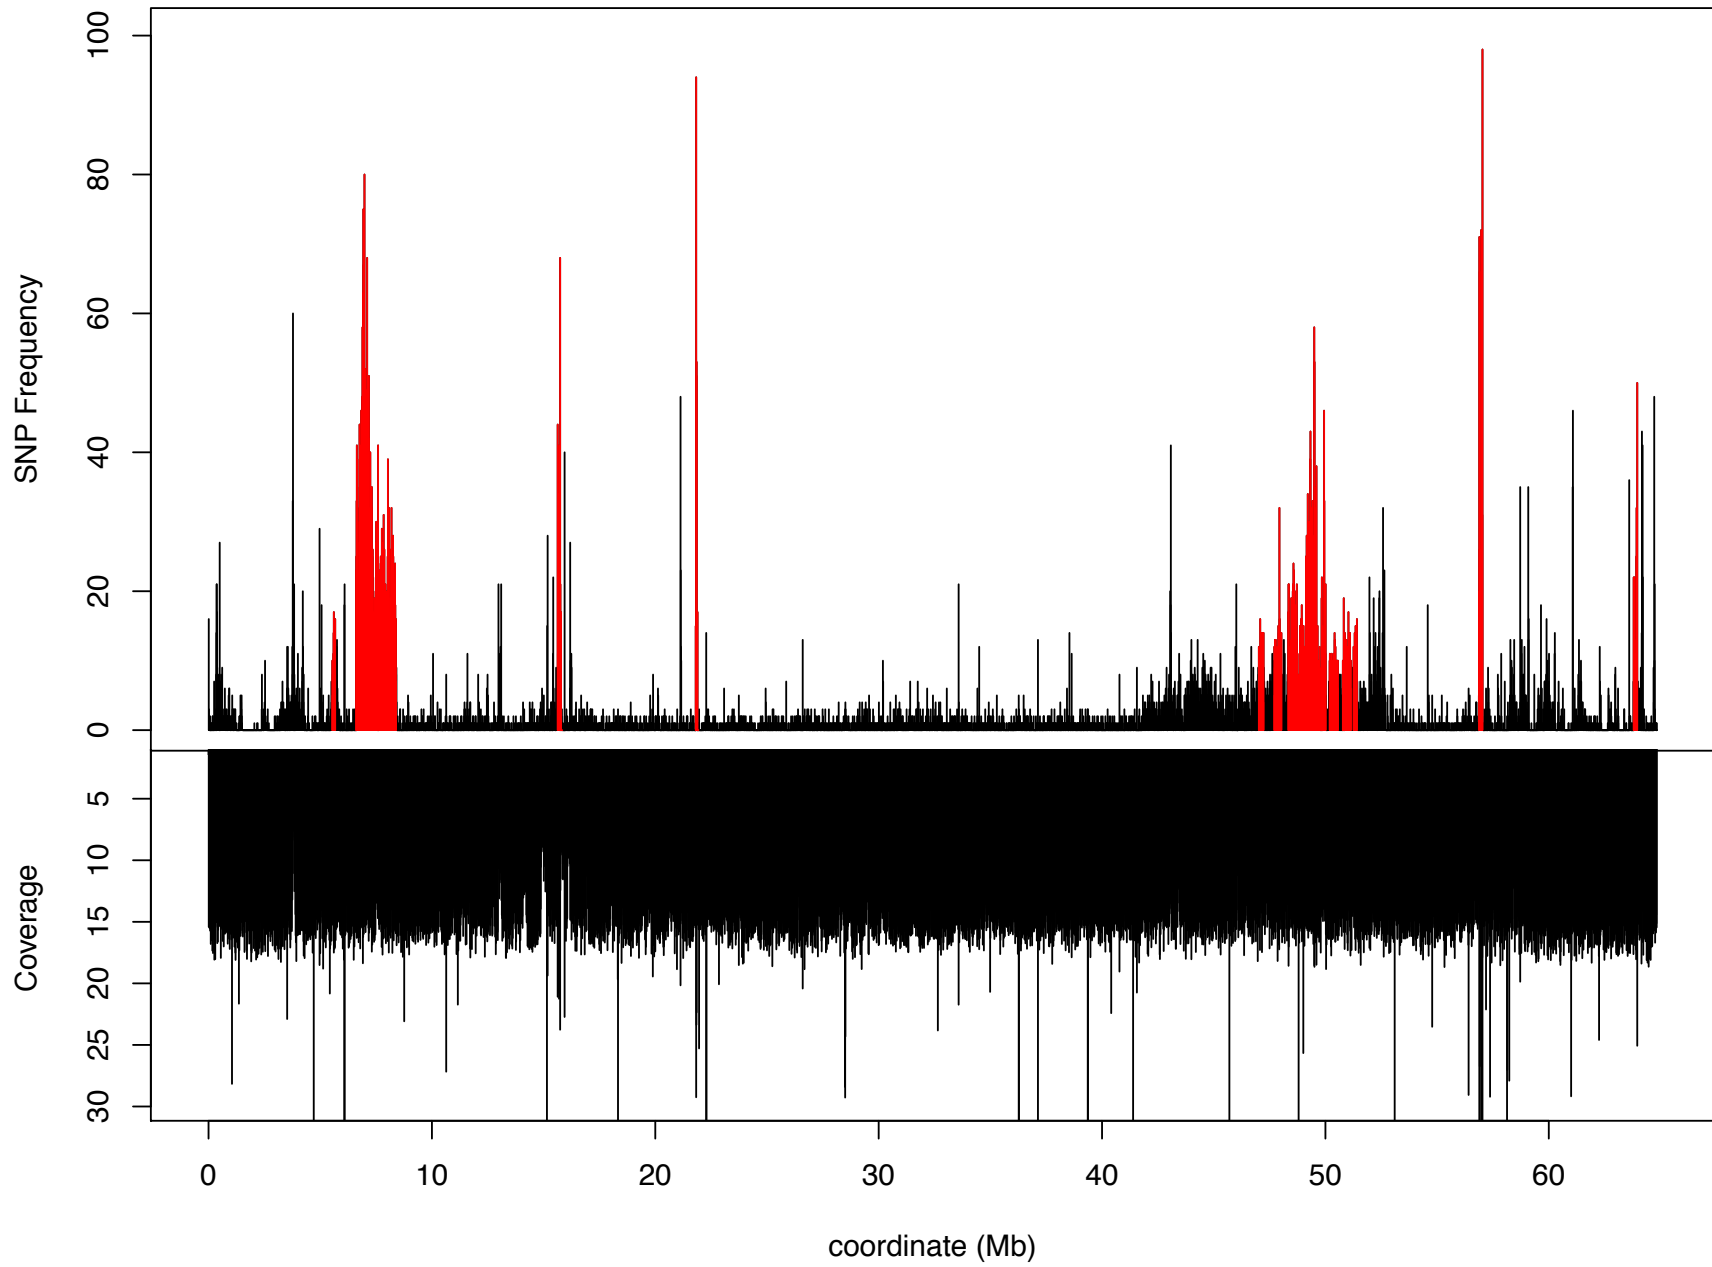

# Chromosome 11

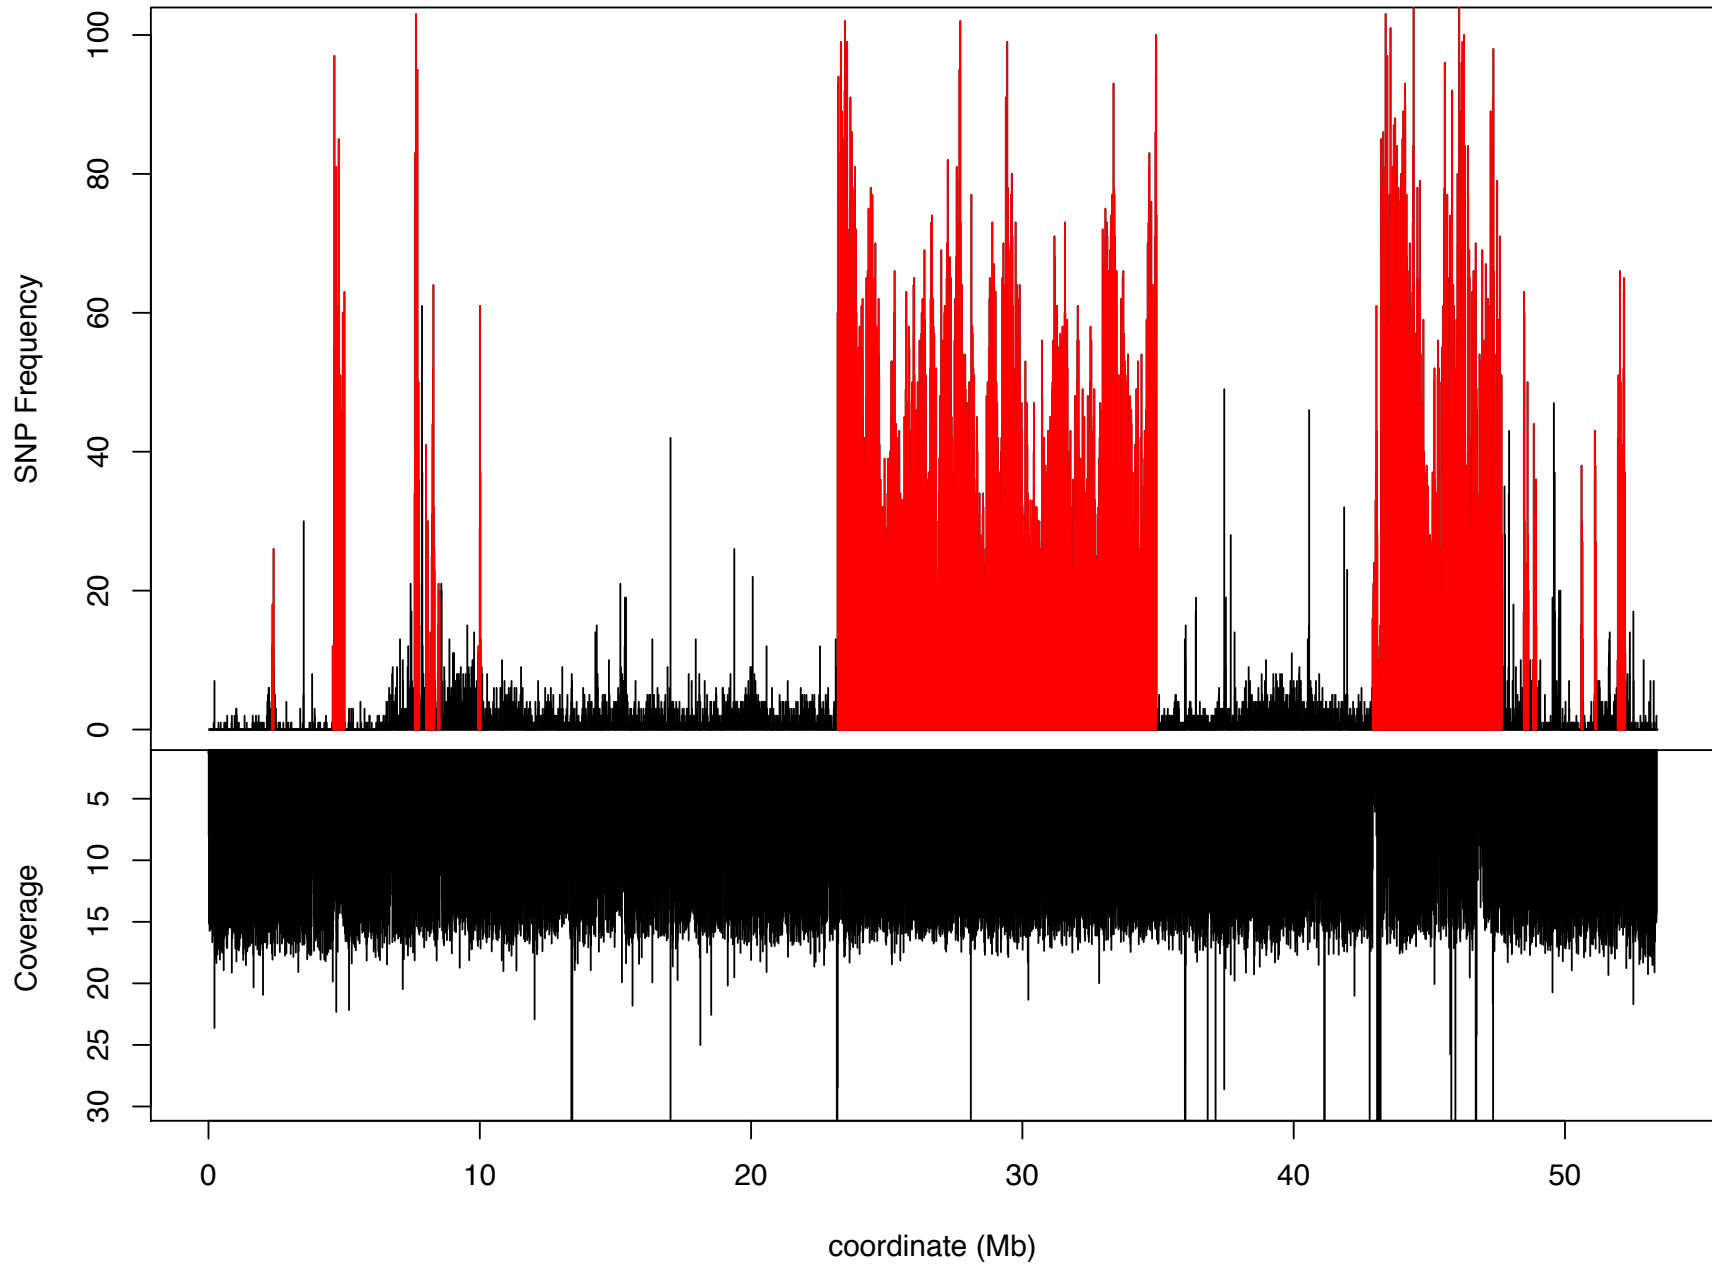

# Chromosome 12

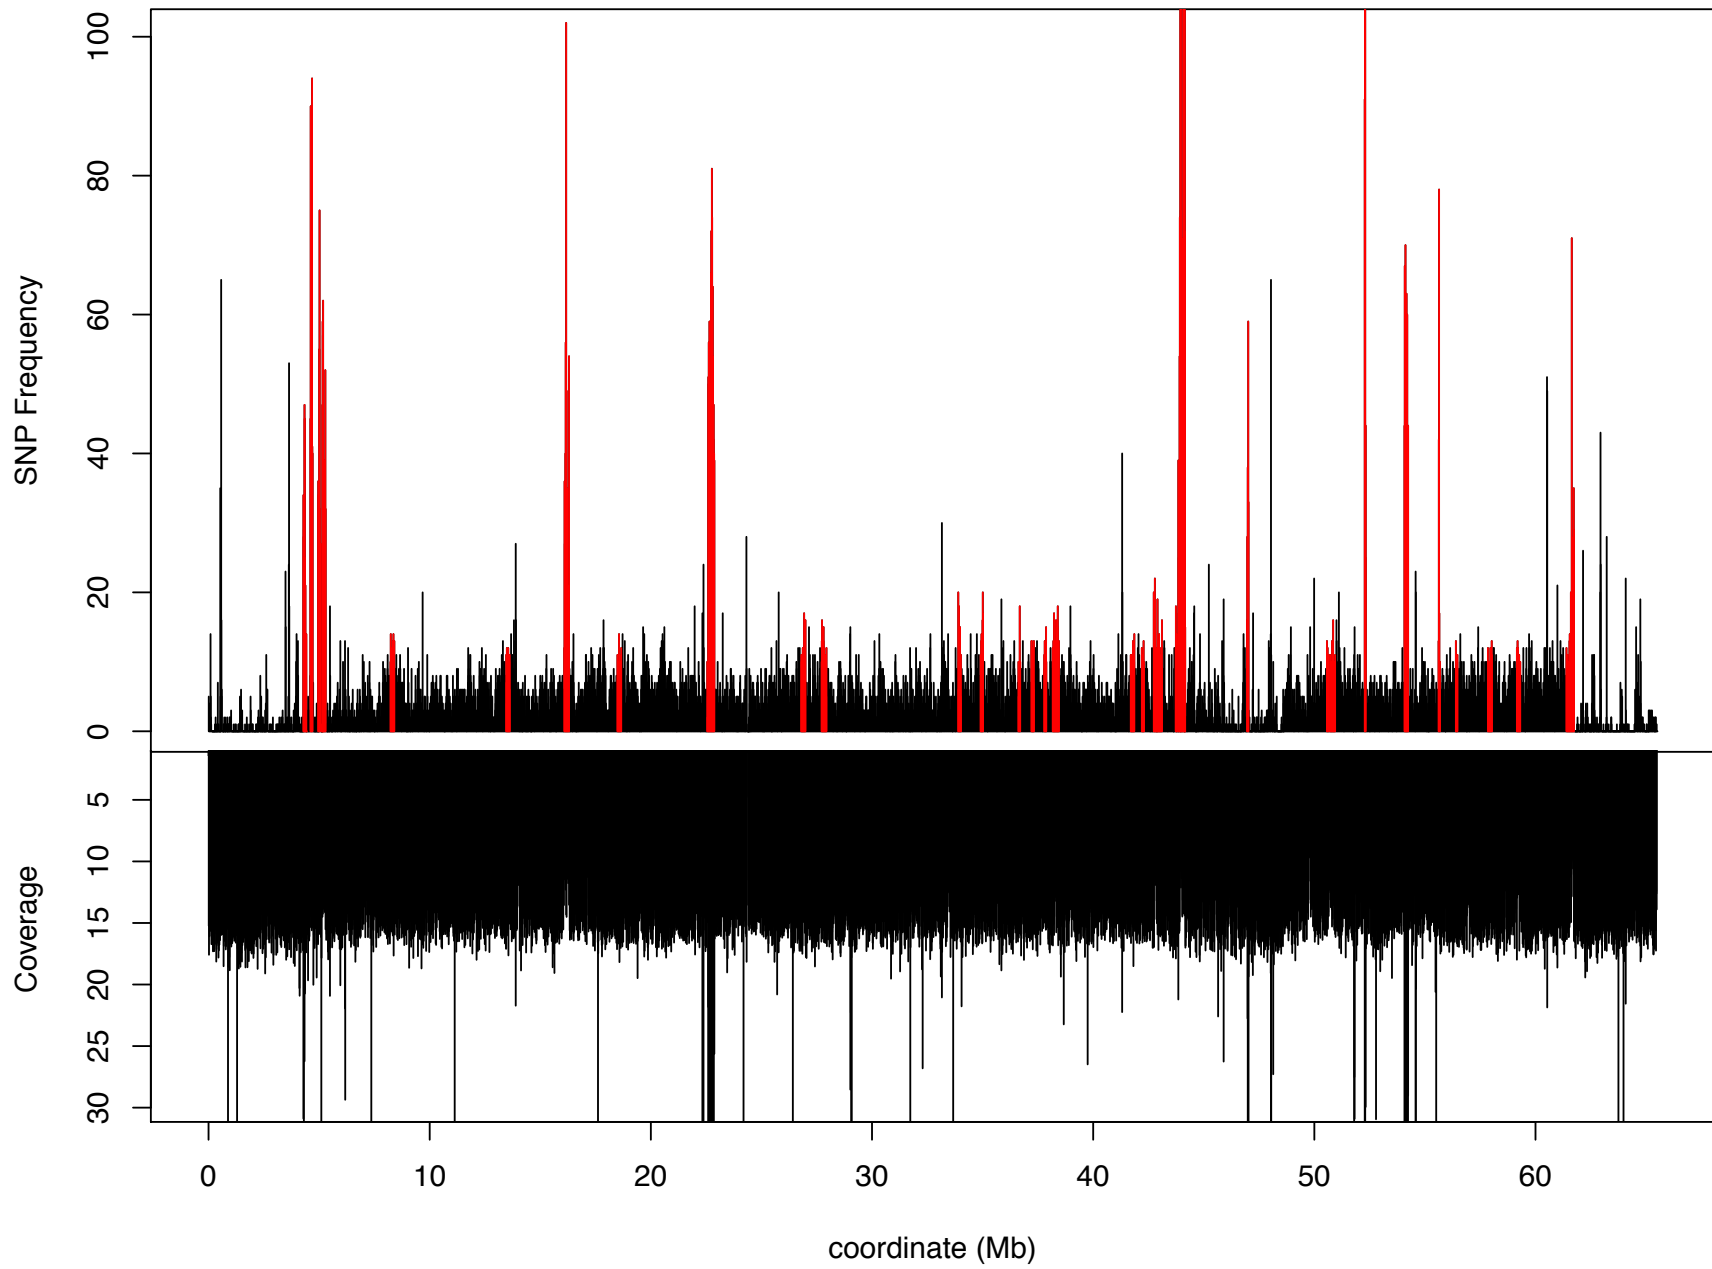

Supplement: 12870_2014_287_MOESM1_ESM.pdf [file 12870_2014_287_MOESM1_ESM.pdf]
