# Supplementary material for: Analysis of wild-species introgressions in tomato inbreds uncovers ancestral origins
Source: PubMed Central journal article supplement (PMC4219026; doi:10.1186/s12870-014-0287-2), 2014-10-28
Supplement: 12870_2014_287_MOESM4_ESM.pdf [file 12870_2014_287_MOESM4_ESM.pdf]

| #  | chromosome | size (bp)  | start      | end        | # of SNPs | # of tomato gene models |
|----|------------|------------|------------|------------|-----------|-------------------------|
| 1  | SL2.40ch01 | 110,000    | 290,001    | 400,000    | 249       | 13                      |
| 2  | SL2.40ch01 | 170,000    | 2,420,001  | 2,590,000  | 312       | 17                      |
| 3  | SL2.40ch01 | 150,000    | 4,000,001  | 4,150,000  | 376       | 4                       |
| 4  | SL2.40ch01 | 220,000    | 5,920,001  | 6,140,000  | 400       | -                       |
| 5  | SL2.40ch01 | 400,000    | 39,550,001 | 39,950,000 | 564       | 5                       |
| 6  | SL2.40ch01 | 460,000    | 74,540,001 | 75,000,000 | 1,999     | 50                      |
| 7  | SL2.40ch01 | 130,000    | 78,400,001 | 78,530,000 | 523       | 18                      |
| 8  | SL2.40ch01 | 70,000     | 80,290,001 | 80,360,000 | 159       | 9                       |
| 9  | SL2.40ch01 | 50,000     | 81,320,001 | 81,370,000 | 157       | 3                       |
| 10 | SL2.40ch01 | 80,000     | 86,850,001 | 86,930,000 | 287       | 12                      |
| 11 | SL2.40ch01 | 720,000    | 87,660,001 | 88,380,000 | 3,179     | 108                     |
| 12 | SL2.40ch02 | 100,000    | 28,790,001 | 28,890,000 | 269       | 6                       |
| 13 | SL2.40ch02 | 140,000    | 31,850,001 | 31,990,000 | 295       | 19                      |
| 14 | SL2.40ch02 | 280,000    | 32,120,001 | 32,400,000 | 277       | 35                      |
| 15 | SL2.40ch02 | 140,000    | 33,600,001 | 33,740,000 | 179       | 16                      |
| 16 | SL2.40ch02 | 320,000    | 34,110,001 | 34,430,000 | 380       | 33                      |
| 17 | SL2.40ch02 | 1,000,000  | 34,480,001 | 35,480,000 | 3,743     | 141                     |
| 18 | SL2.40ch02 | 200,000    | 36,360,001 | 36,560,000 | 224       | 23                      |
| 19 | SL2.40ch02 | 520,000    | 36,610,001 | 37,130,000 | 566       | 73                      |
| 20 | SL2.40ch02 | 450,000    | 38,350,001 | 38,800,000 | 1,611     | 59                      |
| 21 | SL2.40ch03 | 70,000     | 1,020,001  | 1,090,000  | 267       | 7                       |
| 22 | SL2.40ch03 | 80,000     | 2,020,001  | 2,100,000  | 221       | 6                       |
| 23 | SL2.40ch03 | 90,000     | 49,700,001 | 49,790,000 | 95        | 4                       |
| 24 | SL2.40ch03 | 80,000     | 55,810,001 | 55,890,000 | 115       | 9                       |
| 25 | SL2.40ch03 | 200,000    | 56,000,001 | 56,200,000 | 449       | 19                      |
| 26 | SL2.40ch03 | 110,000    | 56,360,001 | 56,470,000 | 99        | 10                      |
| 27 | SL2.40ch03 | 150,000    | 56,520,001 | 56,670,000 | 359       | 15                      |
| 28 | SL2.40ch03 | 170,000    | 56,890,001 | 57,060,000 | 181       | 17                      |
| 29 | SL2.40ch03 | 1,730,000  | 57,110,001 | 58,840,000 | 6,629     | 222                     |
| 30 | SL2.40ch03 | 120,000    | 59,340,001 | 59,460,000 | 210       | 16                      |
| 31 | SL2.40ch03 | 80,000     | 60,760,001 | 60,840,000 | 345       | 14                      |
| 32 | SL2.40ch03 | 290,000    | 61,010,001 | 61,300,000 | 750       | 37                      |
| 33 | SL2.40ch03 | 50,000     | 61,450,001 | 61,500,000 | 137       | 3                       |
| 34 | SL2.40ch04 | 170,000    | 690,001    | 860,000    | 373       | 15                      |
| 35 | SL2.40ch04 | 130,000    | 5,250,001  | 5,380,000  | 615       | 13                      |
| 36 | SL2.40ch04 | 42,870,000 | 7,270,001  | 50,140,000 | 242,468   | 686                     |
| 37 | SL2.40ch04 | 90,000     | 54,160,001 | 54,250,000 | 437       | 9                       |
| 38 | SL2.40ch04 | 440,000    | 54,360,001 | 54,800,000 | 935       | 41                      |
| 39 | SL2.40ch04 | 670,000    | 54,850,001 | 55,520,000 | 2,086     | 49                      |
| 40 | SL2.40ch04 | 130,000    | 57,310,001 | 57,440,000 | 175       | 14                      |
| 41 | SL2.40ch04 | 2,130,000  | 57,490,001 | 59,620,000 | 8,823     | 217                     |
| 42 | SL2.40ch04 | 100,000    | 59,920,001 | 60,020,000 | 141       | 6                       |
| 43 | SL2.40ch04 | 430,000    | 61,640,001 | 62,070,000 | 2,016     | 54                      |
| 44 | SL2.40ch04 | 1,730,000  | 62,330,001 | 64,060,000 | 6,945     | 237                     |
| 45 | SL2.40ch05 | 820,000    | 3,430,001  | 4,250,000  | 3,743     | 75                      |
| 46 | SL2.40ch05 | 70,000     | 5,950,001  | 6,020,000  | 163       | 8                       |
| 47 | SL2.40ch05 | 280,000    | 9,300,001  | 9,580,000  | 312       | 1                       |
| 48 | SL2.40ch05 | 360,000    | 58,890,001 | 59,250,000 | 1,867     | 20                      |
| 49 | SL2.40ch05 | 450,000    | 59,940,001 | 60,390,000 | 1,921     | 38                      |

|    |            |           |            |            |        |     |
|----|------------|-----------|------------|------------|--------|-----|
| 50 | SL2.40ch05 | 470,000   | 60,590,001 | 61,060,000 | 2,232  | 34  |
| 51 | SL2.40ch05 | 1,350,000 | 61,530,001 | 62,880,000 | 4,956  | 163 |
| 52 | SL2.40ch05 | 170,000   | 62,930,001 | 63,100,000 | 221    | 15  |
| 53 | SL2.40ch05 | 260,000   | 63,150,001 | 63,410,000 | 323    | 30  |
| 54 | SL2.40ch05 | 170,000   | 63,670,001 | 63,840,000 | 234    | 23  |
| 55 | SL2.40ch05 | 860,000   | 64,160,001 | 65,020,000 | 1,680  | 125 |
| 56 | SL2.40ch06 | 2,680,000 | 1          | 2,680,000  | 13,148 | 274 |
| 57 | SL2.40ch06 | 990,000   | 2,730,001  | 3,720,000  | 4,704  | 97  |
| 58 | SL2.40ch06 | 120,000   | 3,770,001  | 3,890,000  | 629    | 7   |
| 59 | SL2.40ch06 | 400,000   | 4,040,001  | 4,440,000  | 3,457  | 11  |
| 60 | SL2.40ch06 | 460,000   | 4,540,001  | 5,000,000  | 2,615  | 14  |
| 61 | SL2.40ch06 | 770,000   | 5,180,001  | 5,950,000  | 2,953  | 13  |
| 62 | SL2.40ch06 | 180,000   | 6,130,001  | 6,310,000  | 580    | 1   |
| 63 | SL2.40ch06 | 220,000   | 6,360,001  | 6,580,000  | 415    | 7   |
| 64 | SL2.40ch06 | 420,000   | 6,630,001  | 7,050,000  | 1,883  | 7   |
| 65 | SL2.40ch06 | 550,000   | 7,220,001  | 7,770,000  | 1,278  | 6   |
| 66 | SL2.40ch06 | 590,000   | 7,880,001  | 8,470,000  | 1,994  | 10  |
| 67 | SL2.40ch06 | 250,000   | 9,420,001  | 9,670,000  | 668    | 3   |
| 68 | SL2.40ch06 | 110,000   | 9,770,001  | 9,880,000  | 248    | 1   |
| 69 | SL2.40ch06 | 110,000   | 10,070,001 | 10,180,000 | 119    | 3   |
| 70 | SL2.40ch06 | 430,000   | 10,490,001 | 10,920,000 | 1,606  | 7   |
| 71 | SL2.40ch06 | 370,000   | 11,960,001 | 12,330,000 | 923    | 8   |
| 72 | SL2.40ch06 | 430,000   | 12,590,001 | 13,020,000 | 1,272  | 2   |
| 73 | SL2.40ch06 | 70,000    | 13,380,001 | 13,450,000 | 323    | 2   |
| 74 | SL2.40ch06 | 760,000   | 14,010,001 | 14,770,000 | 2,091  | 15  |
| 75 | SL2.40ch06 | 140,000   | 15,310,001 | 15,450,000 | 251    | 2   |
| 76 | SL2.40ch06 | 200,000   | 15,500,001 | 15,700,000 | 776    | 3   |
| 77 | SL2.40ch06 | 90,000    | 15,750,001 | 15,840,000 | 132    | -   |
| 78 | SL2.40ch06 | 1,020,000 | 15,890,001 | 16,910,000 | 2,964  | 11  |
| 79 | SL2.40ch06 | 420,000   | 17,170,001 | 17,590,000 | 1,972  | 5   |
| 80 | SL2.40ch06 | 60,000    | 17,810,001 | 17,870,000 | 232    | -   |
| 81 | SL2.40ch06 | 110,000   | 19,220,001 | 19,330,000 | 135    | 1   |
| 82 | SL2.40ch06 | 210,000   | 19,480,001 | 19,690,000 | 488    | 1   |
| 83 | SL2.40ch06 | 80,000    | 19,940,001 | 20,020,000 | 354    | 4   |
| 84 | SL2.40ch06 | 190,000   | 20,070,001 | 20,260,000 | 510    | 17  |
| 85 | SL2.40ch06 | 220,000   | 20,310,001 | 20,530,000 | 787    | 12  |
| 86 | SL2.40ch06 | 660,000   | 20,640,001 | 21,300,000 | 1,815  | 34  |
| 87 | SL2.40ch06 | 180,000   | 21,350,001 | 21,530,000 | 459    | 9   |
| 88 | SL2.40ch06 | 720,000   | 21,720,001 | 22,440,000 | 2,119  | 45  |
| 89 | SL2.40ch06 | 360,000   | 22,490,001 | 22,850,000 | 1,140  | 19  |
| 90 | SL2.40ch06 | 110,000   | 23,070,001 | 23,180,000 | 552    | 5   |
| 91 | SL2.40ch06 | 230,000   | 23,230,001 | 23,460,000 | 618    | 4   |
| 92 | SL2.40ch06 | 260,000   | 23,510,001 | 23,770,000 | 670    | 5   |
| 93 | SL2.40ch06 | 200,000   | 23,820,001 | 24,020,000 | 1,436  | 7   |
| 94 | SL2.40ch06 | 210,000   | 24,410,001 | 24,620,000 | 869    | 3   |
| 95 | SL2.40ch06 | 110,000   | 25,270,001 | 25,380,000 | 600    | 4   |
| 96 | SL2.40ch06 | 450,000   | 25,800,001 | 26,250,000 | 1,806  | 15  |
| 97 | SL2.40ch06 | 300,000   | 26,830,001 | 27,130,000 | 659    | 5   |
| 98 | SL2.40ch06 | 90,000    | 27,180,001 | 27,270,000 | 107    | -   |
| 99 | SL2.40ch06 | 290,000   | 27,460,001 | 27,750,000 | 1,414  | 18  |

|     |               |                    |            |            |                |              |
|-----|---------------|--------------------|------------|------------|----------------|--------------|
| 100 | SL2.40ch06    | 1,330,000          | 30,810,001 | 32,140,000 | 9,074          | 76           |
| 101 | SL2.40ch06    | 170,000            | 36,890,001 | 37,060,000 | 844            | 25           |
| 102 | SL2.40ch06    | 190,000            | 42,170,001 | 42,360,000 | 635            | 27           |
| 103 | SL2.40ch07    | 150,000            | 3,630,001  | 3,780,000  | 282            | 14           |
| 104 | SL2.40ch07    | 110,000            | 5,350,001  | 5,460,000  | 134            | 1            |
| 105 | SL2.40ch07    | 120,000            | 19,790,001 | 19,910,000 | 556            | 1            |
| 106 | SL2.40ch07    | 660,000            | 55,210,001 | 55,870,000 | 2,265          | 58           |
| 107 | SL2.40ch07    | 1,290,000          | 57,040,001 | 58,330,000 | 5,307          | 102          |
| 108 | SL2.40ch07    | 150,000            | 59,900,001 | 60,050,000 | 231            | 17           |
| 109 | SL2.40ch07    | 250,000            | 62,170,001 | 62,420,000 | 1,078          | 33           |
| 110 | SL2.40ch08    | 90,000             | 150,001    | 240,000    | 272            | 8            |
| 111 | SL2.40ch08    | 70,000             | 910,001    | 980,000    | 193            | 8            |
| 112 | SL2.40ch08    | 80,000             | 3,230,001  | 3,310,000  | 201            | 6            |
| 113 | SL2.40ch08    | 130,000            | 3,360,001  | 3,490,000  | 328            | 4            |
| 114 | SL2.40ch08    | 100,000            | 61,390,001 | 61,490,000 | 186            | 10           |
| 115 | SL2.40ch09    | 400,000            | 600,001    | 1,000,000  | 1,684          | 57           |
| 116 | SL2.40ch09    | 470,000            | 1,170,001  | 1,640,000  | 1,566          | 61           |
| 117 | SL2.40ch09    | 6,890,000          | 5,240,001  | 12,130,000 | 27,104         | 191          |
| 118 | SL2.40ch09    | 7,020,000          | 12,180,001 | 19,200,000 | 49,038         | 117          |
| 119 | SL2.40ch09    | 12,370,000         | 19,730,001 | 32,100,000 | 38,854         | 154          |
| 120 | SL2.40ch09    | 25,850,000         | 32,150,001 | 58,000,000 | 91,824         | 468          |
| 121 | SL2.40ch09    | 60,000             | 64,280,001 | 64,340,000 | 215            | 5            |
| 122 | SL2.40ch09    | 60,000             | 66,360,001 | 66,420,000 | 188            | 5            |
| 123 | SL2.40ch09    | 90,000             | 66,750,001 | 66,840,000 | 242            | 10           |
| 124 | SL2.40ch09    | 80,000             | 66,990,001 | 67,070,000 | 201            | 11           |
| 125 | SL2.40ch10    | 190,000            | 170,001    | 360,000    | 335            | 26           |
| 126 | SL2.40ch10    | 1,360,000          | 6,600,001  | 7,960,000  | 3,234          | 33           |
| 127 | SL2.40ch10    | 110,000            | 8,010,001  | 8,120,000  | 129            | 2            |
| 128 | SL2.40ch10    | 240,000            | 8,170,001  | 8,410,000  | 359            | 2            |
| 129 | SL2.40ch10    | 130,000            | 15,620,001 | 15,750,000 | 250            | -            |
| 130 | SL2.40ch10    | 110,000            | 47,010,001 | 47,120,000 | 91             | 3            |
| 131 | SL2.40ch10    | 360,000            | 48,340,001 | 48,700,000 | 446            | 16           |
| 132 | SL2.40ch10    | 680,000            | 48,850,001 | 49,530,000 | 964            | 11           |
| 133 | SL2.40ch10    | 190,000            | 49,820,001 | 50,010,000 | 189            | 6            |
| 134 | SL2.40ch10    | 110,000            | 50,810,001 | 50,920,000 | 94             | 3            |
| 135 | SL2.40ch10    | 140,000            | 62,840,001 | 62,980,000 | 661            | 20           |
| 136 | SL2.40ch10    | 170,000            | 63,790,001 | 63,960,000 | 163            | 27           |
| 137 | SL2.40ch11    | 390,000            | 4,620,001  | 5,010,000  | 1,749          | 51           |
| 138 | SL2.40ch11    | 330,000            | 5,340,001  | 5,670,000  | 1,374          | 36           |
| 139 | SL2.40ch11    | 6,120,000          | 7,170,001  | 13,290,000 | 22,504         | 220          |
| 140 | SL2.40ch11    | 120,000            | 42,930,001 | 43,050,000 | 255            | 4            |
| 141 | SL2.40ch11    | 430,000            | 47,360,001 | 47,790,000 | 1,316          | 35           |
| 142 | SL2.40ch11    | 110,000            | 48,590,001 | 48,700,000 | 153            | 6            |
| 143 | SL2.40ch11    | 480,000            | 48,810,001 | 49,290,000 | 2,044          | 40           |
| 144 | SL2.40ch11    | 60,000             | 50,590,001 | 50,650,000 | 164            | 4            |
| 145 | SL2.40ch11    | 60,000             | 51,090,001 | 51,150,000 | 171            | 3            |
| 146 | SL2.40ch12    | 190,000            | 16,110,001 | 16,300,000 | 264            | 3            |
|     | <b>Total:</b> | <b>150,160,000</b> |            |            | <b>641,454</b> | <b>5,633</b> |
