# Supplementary material for: Analysis of wild-species introgressions in tomato inbreds uncovers ancestral origins
Source: PubMed Central journal article supplement (PMC4219026; doi:10.1186/s12870-014-0287-2), 2014-10-28
Supplement: 12870_2014_287_MOESM5_ESM.pdf [file 12870_2014_287_MOESM5_ESM.pdf]

|            | SNP density regions GH13 x Heinz (WGS) |            |            |                                    |                                      |                                  | Gh13 x HUJ (SolCAP) |            |                              |                                                    |
|------------|----------------------------------------|------------|------------|------------------------------------|--------------------------------------|----------------------------------|---------------------|------------|------------------------------|----------------------------------------------------|
| chromosome | size (bp)                              | Start      | End        | # of tomato gene models WGS region | Number of SNPs in Gh13 introgression | Predicted introgression (origin) | Start               | End        | # nt in introgression SolCAP | number of polymorphic SolCAP markers (monomorphic) |
| SL2.40ch01 | 60,000                                 | 290,001    | 350,000    | 9                                  | 147                                  | Heinz (unknown)                  |                     |            |                              |                                                    |
| SL2.40ch01 | 60,000                                 | 650,001    | 710,000    | 3                                  | 66                                   | Gh13 (Unknown)                   |                     |            |                              |                                                    |
| SL2.40ch01 | 170,000                                | 2,420,001  | 2,590,000  | 17                                 | 361                                  | Gh13 and Heinz (unknown)         | 2,255,882           | 2,463,253  | 207,371                      | 14 (1)                                             |
| SL2.40ch01 | 150,000                                | 4,000,001  | 4,150,000  | 4                                  | 406                                  | Heinz (unknown)                  |                     |            |                              |                                                    |
| SL2.40ch01 | 60,000                                 | 4,940,001  | 5,000,000  | 5                                  | 272                                  | Gh13 (Unknown)                   |                     |            |                              |                                                    |
| SL2.40ch01 | 220,000                                | 5,920,001  | 6,140,000  | 0                                  | 889                                  | Heinz (unknown)                  |                     |            |                              |                                                    |
| SL2.40ch01 | 340,000                                | 10,680,001 | 11,020,000 | 4                                  | 890                                  | Heinz (unknown)                  |                     |            |                              |                                                    |
| SL2.40ch01 | 100,000                                | 23,870,001 | 23,970,000 | 42                                 | 94                                   | Gh13 and Heinz (unknown)         |                     |            |                              |                                                    |
| SL2.40ch01 | 120,000                                | 37,240,001 | 37,360,000 | 2                                  | 180                                  | Gh13 and Heinz (unknown)         |                     |            |                              |                                                    |
| SL2.40ch01 | 400,000                                | 39,550,001 | 39,950,000 | 5                                  | 619                                  | Heinz (unknown)                  |                     |            |                              |                                                    |
| SL2.40ch01 |                                        |            |            |                                    |                                      |                                  | 70,262,679          | 70,579,788 | 317,109                      | 5 (0)                                              |
| SL2.40ch01 |                                        |            |            |                                    |                                      |                                  | 72,796,829          | 73,233,146 | 436,317                      | 8 (1)                                              |
| SL2.40ch01 | 70,000                                 | 80,290,001 | 80,360,000 | 9                                  | 159                                  | Heinz (unknown)                  |                     |            |                              |                                                    |
| SL2.40ch01 | 50,000                                 | 81,320,001 | 81,370,000 | 3                                  | 155                                  | Heinz (unknown)                  |                     |            |                              |                                                    |
| SL2.40ch01 | 80,000                                 | 86,850,001 | 86,930,000 | 12                                 | 270                                  | Heinz (unknown)                  |                     |            |                              |                                                    |
| SL2.40ch01 | 80,000                                 | 90,220,001 | 90,300,000 | 5                                  | 329                                  | Heinz (unknown)                  |                     |            |                              |                                                    |
| SL2.40ch02 | 70,000                                 | 4,030,001  | 4,100,000  | 0                                  | 209                                  | Heinz (unknown)                  |                     |            |                              |                                                    |
| SL2.40ch02 | 110,000                                | 4,980,001  | 5,090,000  | 18                                 | 128                                  | Gh13 (Unknown)                   |                     |            |                              |                                                    |
| SL2.40ch02 | 160,000                                | 20,590,001 | 20,750,000 | 2                                  | 216                                  | Heinz (unknown)                  |                     |            |                              |                                                    |
| SL2.40ch02 | 80,000                                 | 27,500,001 | 27,580,000 | 1                                  | 140                                  | Heinz (unknown)                  |                     |            |                              |                                                    |
| SL2.40ch02 | 290,000                                | 31,510,001 | 31,800,000 | 18                                 | 708                                  | Heinz (unknown)                  |                     |            |                              |                                                    |
| SL2.40ch02 | 140,000                                | 31,850,001 | 31,990,000 | 19                                 | 297                                  | Heinz (unknown)                  | 31,567,643          | 31,920,553 | 352,910                      | 11 (4)                                             |
| SL2.40ch02 | 200,000                                | 32,200,001 | 32,400,000 | 25                                 | 227                                  | Heinz (unknown)                  |                     |            |                              |                                                    |
| SL2.40ch02 | 50,000                                 | 34,670,001 | 34,720,000 | 10                                 | 92                                   | Heinz (unknown)                  |                     |            |                              |                                                    |
| SL2.40ch02 |                                        |            |            |                                    |                                      |                                  | 34,096,831          | 34,388,704 | 291,873                      | 9 (1)                                              |
| SL2.40ch02 | 50,000                                 | 37,370,001 | 37,420,000 | 2                                  | 110                                  | Gh13 (Unknown)                   |                     |            |                              |                                                    |
| SL2.40ch02 |                                        |            |            |                                    |                                      |                                  | 39,890,909          | 39,907,966 | 17,057                       | 13 (0)                                             |
| SL2.40ch03 |                                        |            |            |                                    |                                      |                                  | 71,076              | 828,684    | 757,608                      | 8 (6)                                              |
| SL2.40ch03 |                                        |            |            |                                    |                                      |                                  | 7,085,127           | 7,095,859  | 10,732                       | 3 (0)                                              |
| SL2.40ch03 | 70,000                                 | 1,020,001  | 1,090,000  | 7                                  | 254                                  | Gh13 and Heinz (unknown)         |                     |            |                              |                                                    |

|            |           |            |            |     |        |                          |            |            |            |          |
|------------|-----------|------------|------------|-----|--------|--------------------------|------------|------------|------------|----------|
| SL2.40ch03 | 60,000    | 1,250,001  | 1,310,000  | 8   | 112    | Gh13 and Heinz (unknown) |            |            |            |          |
| SL2.40ch03 | 80,000    | 2,020,001  | 2,100,000  | 6   | 212    | Heinz (unknown)          |            |            |            |          |
| SL2.40ch03 | 310,000   | 10,730,001 | 11,040,000 | 11  | 413    | Heinz (unknown)          |            |            |            |          |
| SL2.40ch03 | 140,000   | 17,260,001 | 17,400,000 | 1   | 334    | Heinz (unknown)          |            |            |            |          |
| SL2.40ch03 | 90,000    | 45,550,001 | 45,640,000 | 8   | 222    | Gh13 (Unknown)           | 45,591,053 | 45,630,131 | 39,078     | 11 (0)   |
| SL2.40ch03 | 50,000    | 48,100,001 | 48,150,000 | 2   | 180    | Heinz (unknown)          |            |            |            |          |
| SL2.40ch03 | 60,000    | 49,700,001 | 49,760,000 | 1   | 77     | Gh13 (Unknown)           |            |            |            |          |
| SL2.40ch03 | 90,000    | 56,100,001 | 56,190,000 | 8   | 262    | Heinz (unknown)          |            |            |            |          |
| SL2.40ch03 |           |            |            |     |        |                          | 57,030,423 | 57,366,629 | 336,206    | 11 (5)   |
| SL2.40ch03 |           |            |            |     |        |                          | 57,671,208 | 58,803,206 | 1,131,998  | 12 (6)   |
| SL2.40ch03 | 120,000   | 59,340,001 | 59,460,000 | 16  | 194    | Gh13 (Unknown)           |            |            |            |          |
| SL2.40ch03 |           |            |            |     |        |                          | 60,773,120 | 60,818,312 | 45,192     | 29 (1)   |
| SL2.40ch04 | 90,000    | 690,001    | 780,000    | 8   | 187    | Heinz (unknown)          | 744,896    | 993,580    | 248,684    | 14 (9)   |
| SL2.40ch04 | 250,000   | 4,470,001  | 4,720,000  | 29  | 279    | Heinz (unknown)          | 4,635,914  | 4,647,789  | 11,875     | 3 (1)    |
| SL2.40ch04 | 690,000   | 28,670,001 | 29,360,000 | 2   | 1,207  | Heinz (unknown)          |            |            |            |          |
| SL2.40ch04 | 2,170,000 | 53,350,001 | 55,520,000 | 158 | 11,030 | Heinz (200 Kb unknown)   |            |            |            |          |
| SL2.40ch04 | 130,000   | 57,310,001 | 57,440,000 | 14  | 168    | Heinz (unknown)          |            |            |            |          |
| SL2.40ch04 | 2,150,000 | 57,490,001 | 59,640,000 | 220 | 8,555  | pimpinellifolium)        |            |            |            |          |
| SL2.40ch04 | 100,000   | 59,920,001 | 60,020,000 | 6   | 149    | Heinz (unknown)          |            |            |            |          |
| SL2.40ch04 | 140,000   | 60,520,001 | 60,660,000 | 21  | 179    | Gh13 (Unknown)           |            |            |            |          |
| SL2.40ch05 |           |            |            |     |        |                          | 734,561    | 736,089    | 1,528      | 5 (0)    |
| SL2.40ch05 |           |            |            |     |        |                          | 3,437,023  | 4,244,925  | 807,902    | 105 (6)  |
| SL2.40ch05 | 80,000    | 5,950,001  | 6,030,000  | 9   | 187    | Heinz (unknown)          |            |            |            |          |
| SL2.40ch05 | 780,000   | 8,930,001  | 9,710,000  | 26  | 1,061  | Gh13 (Unknown)           |            |            |            |          |
| SL2.40ch05 | 180,000   | 59,250,001 | 59,430,000 | 10  | 802    | Heinz (unknown)          | 7,473,754  | 59,429,177 | 51,955,423 | 126 (34) |
| SL2.40ch05 | 450,000   | 59,940,001 | 60,390,000 | 38  | 2,072  | Heinz (unknown)          |            |            |            |          |
| SL2.40ch05 |           |            |            |     |        |                          | 60,639,488 | 61,040,201 | 400,713    | 38 (1)   |
| SL2.40ch05 | 110,000   | 62,340,001 | 62,450,000 | 13  | 118    | Heinz (unknown)          | 61,927,092 | 62,644,894 | 717,802    | 67 (3)   |
| SL2.40ch05 | 50,000    | 62,950,001 | 63,000,000 | 3   | 140    | Gh13 (Unknown)           |            |            |            |          |
| SL2.40ch06 | 160,000   | 1,600,001  | 1,760,000  | 25  | 337    |                          |            |            |            |          |
| SL2.40ch06 |           |            |            |     |        | Gh13 and Heinz (unknown) | 2,083,443  | 2,386,312  | 302,869    | 8 (5)    |
| SL2.40ch06 | 80,000    | 14,660,001 | 14,740,000 | 6   | 220    | Heinz (unknown)          |            |            |            |          |
| SL2.40ch06 | 150,000   | 15,230,001 | 15,380,000 | 2   | 241    | Heinz (unknown)          |            |            |            |          |
| SL2.40ch06 | 3,620,000 | 30,600,001 | 34,220,000 | 284 | 24,831 | Gh13 (S. chilense)       | 30,623,784 | 33,972,993 | 3,349,209  | 29 (10)  |
| SL2.40ch07 |           |            |            |     |        |                          | 1,815,826  | 2,131,288  | 315,462    | 7 (4)    |
| SL2.40ch07 | 150,000   | 3,630,001  | 3,780,000  | 14  | 310    | Gh13 and Heinz (unknown) |            |            |            |          |
| SL2.40ch07 | 170,000   | 5,290,001  | 5,460,000  | 3   | 318    | Heinz (unknown)          |            |            |            |          |
| SL2.40ch07 | 100,000   | 6,750,001  | 6,850,000  | 4   | 157    | Heinz (unknown)          |            |            |            |          |

|            |           |            |            |     |       |                            |            |            |           |         |
|------------|-----------|------------|------------|-----|-------|----------------------------|------------|------------|-----------|---------|
| SL2.40ch07 | 120,000   | 19,790,001 | 19,910,000 | 1   | 521   | Heinz (unknown)            |            |            |           |         |
| SL2.40ch07 | 60,000    | 54,900,001 | 54,960,000 | 4   | 220   | Heinz (unknown)            |            |            |           |         |
| SL2.40ch07 | 1,290,000 | 57,040,001 | 58,330,000 | 102 | 5,899 | Gh13 (Unknown)             | 57,047,892 | 59,386,207 | 2,338,315 | 44 (15) |
| SL2.40ch07 | 190,000   | 59,860,001 | 60,050,000 | 21  | 240   | Gh13 and Heinz (unknown)   |            |            |           |         |
| SL2.40ch07 | 100,000   | 60,540,001 | 60,640,000 | 13  | 95    | Gh13 (Unknown)             |            |            |           |         |
| SL2.40ch07 | 50,000    | 60,930,001 | 60,980,000 | 7   | 248   | Gh13 and Heinz (unknown)   |            |            |           |         |
| SL2.40ch07 | 130,000   | 62,700,001 | 62,830,000 | 15  | 548   | Gh13 (S. pimpinellifolium) | 62,722,518 | 62,821,354 | 98,836    | 7 (2)   |
| SL2.40ch08 |           |            |            |     |       |                            | 35,179     | 236,771    | 201,592   | 4 (2)   |
| SL2.40ch08 | 60,000    | 180,001    | 240,000    | 5   | 232   | Heinz (unknown)            |            |            |           |         |
| SL2.40ch08 | 70,000    | 910,001    | 980,000    | 8   | 193   | Heinz (unknown)            |            |            |           |         |
| SL2.40ch08 | 50,000    | 1,280,001  | 1,330,000  | 2   | 176   | Gh13 (Unknown)             |            |            |           |         |
| SL2.40ch08 | 110,000   | 2,840,001  | 2,950,000  | 11  | 110   | Gh13 and Heinz (unknown)   |            |            |           |         |
| SL2.40ch08 | 80,000    | 3,230,001  | 3,310,000  | 6   | 172   | Heinz (unknown)            |            |            |           |         |
| SL2.40ch08 | 130,000   | 3,360,001  | 3,490,000  | 4   | 317   | Heinz (unknown)            | 2,580,771  | 3,422,383  | 841,612   | 11 (11) |
| SL2.40ch08 | 150,000   | 25,820,001 | 25,970,000 | 1   | 168   | Heinz (unknown)            |            |            |           |         |
| SL2.40ch08 | 60,000    | 40,940,001 | 41,000,000 | 1   | 117   | Heinz (unknown)            |            |            |           |         |
| SL2.40ch08 | 70,000    | 55,080,001 | 55,150,000 | 12  | 122   | Gh13 (Unknown)             | 55,108,214 | 55,124,760 | 16,546    | 7 (0)   |
| SL2.40ch08 | 90,000    | 55,560,001 | 55,650,000 | 7   | 566   | Gh13 and Heinz (unknown)   |            |            |           |         |
| SL2.40ch08 | 70,000    | 59,990,001 | 60,060,000 | 8   | 132   | Heinz (unknown)            | 60,016,886 | 60,467,067 | 450,181   | 7 (1)   |
| SL2.40ch08 | 90,000    | 61,400,001 | 61,490,000 | 9   | 160   | Heinz (unknown)            | 61,303,467 | 61,402,166 | 98,699    | 6 (1)   |
| SL2.40ch09 | 330,000   | 330,001    | 660,000    | 46  | 696   | Gh13 and Heinz (unknown)   | 41,189     | 651,775    | 610,586   | 24 (2)  |
| SL2.40ch09 | 110,000   | 1,530,001  | 1,640,000  | 12  | 347   | Heinz (unknown)            |            |            |           |         |
| SL2.40ch09 | 120,000   | 2,290,001  | 2,410,000  | 17  | 121   | Gh13 and Heinz (unknown)   |            |            |           |         |
| SL2.40ch09 |           |            |            |     |       |                            | 60,765,597 | 61,511,672 | 746,075   | 3 (5)   |
| SL2.40ch09 | 350,000   | 63,180,001 | 63,530,000 | 37  | 538   | Gh13 (Unknown)             |            |            |           |         |
| SL2.40ch09 | 130,000   | 65,130,001 | 65,260,000 | 12  | 239   | Gh13 (Unknown)             | 65,153,501 | 65,211,528 | 58,027    | 4 (0)   |
| SL2.40ch09 | 60,000    | 66,360,001 | 66,420,000 | 5   | 194   | Gh13 (Unknown)             |            |            |           |         |
| SL2.40ch09 | 90,000    | 66,750,001 | 66,840,000 | 10  | 233   | Gh13 (Unknown)             |            |            |           |         |
| SL2.40ch09 | 80,000    | 66,990,001 | 67,070,000 | 11  | 225   | Gh13 (Unknown)             |            |            |           |         |
| SL2.40ch10 |           |            |            |     |       |                            | 889,234    | 1,163,895  | 274,661   | 4 (2)   |
| SL2.40ch10 |           |            |            |     |       |                            | 3,017,289  | 3,092,679  | 75,390    | 3 (0)   |
| SL2.40ch10 | 140,000   | 5,530,001  | 5,670,000  | 0   | 128   | Heinz (unknown)            |            |            |           |         |
| SL2.40ch10 | 1,790,000 | 6,600,001  | 8,390,000  | 39  | 4,652 | Heinz (unknown)            |            |            |           |         |
| SL2.40ch10 | 170,000   | 15,620,001 | 15,790,000 | 0   | 268   | Heinz (unknown)            |            |            |           |         |
| SL2.40ch10 | 90,000    | 21,800,001 | 21,890,000 | 3   | 247   | Heinz (unknown)            |            |            |           |         |
| SL2.40ch10 | 220,000   | 47,010,001 | 47,230,000 | 8   | 204   | Heinz (unknown)            |            |            |           |         |
| SL2.40ch10 | 330,000   | 47,700,001 | 48,030,000 | 4   | 358   | Heinz (unknown)            |            |            |           |         |
| SL2.40ch10 | 410,000   | 48,330,001 | 48,740,000 | 18  | 591   | Heinz (unknown)            |            |            |           |         |

|            |            |            |            |     |        |                              |            |            |            |         |
|------------|------------|------------|------------|-----|--------|------------------------------|------------|------------|------------|---------|
| SL2.40ch10 | 950,000    | 48,790,001 | 49,740,000 | 21  | 1,695  | Heinz (unknown)              |            |            |            |         |
| SL2.40ch10 | 220,000    | 49,790,001 | 50,010,000 | 6   | 311    | Heinz (unknown)              |            |            |            |         |
| SL2.40ch10 | 170,000    | 50,180,001 | 50,350,000 | 3   | 145    | Heinz (unknown)              |            |            |            |         |
| SL2.40ch10 | 160,000    | 50,400,001 | 50,560,000 | 4   | 129    | Heinz (unknown)              |            |            |            |         |
| SL2.40ch10 | 370,000    | 50,770,001 | 51,140,000 | 17  | 330    | Heinz (unknown)              |            |            |            |         |
| SL2.40ch10 | 160,000    | 51,250,001 | 51,410,000 | 5   | 143    | Heinz (unknown)              |            |            |            |         |
| SL2.40ch10 | 160,000    | 56,870,001 | 57,030,000 | 5   | 531    | Gh13 and Heinz (unknown)     |            |            |            |         |
| SL2.40ch10 |            |            |            |     |        |                              | 59,641,345 | 59,988,884 | 347,539    | 4 (4)   |
| SL2.40ch10 | 170,000    | 63,790,001 | 63,960,000 | 27  | 238    | Gh13 and Heinz (unknown)     |            |            |            |         |
| SL2.40ch10 |            |            |            |     |        |                              | 64,133,464 | 64,199,335 | 65,871     | 3 (1)   |
| SL2.40ch11 |            |            |            |     |        |                              | 436,089    | 791,672    | 355,583    | 8 (6)   |
| SL2.40ch11 | 70,000     | 2,330,001  | 2,400,000  | 0   | 98     | 400 Kb)                      |            |            |            |         |
| SL2.40ch11 | 440,000    | 4,570,001  | 5,010,000  | 55  | 1,726  | Gh13 (S. pimpinellifolium ?) | 4,775,241  | 5,471,885  | 696,644    | 39 (8)  |
| SL2.40ch11 | 180,000    | 7,590,001  | 7,770,000  | 5   | 982    | Gh13 (Unknown)               | 7,763,703  | 7,863,337  | 99,634     | 3 (0)   |
| SL2.40ch11 | 100,000    | 8,010,001  | 8,110,000  | 6   | 156    | Gh13 (Unknown)               |            |            |            |         |
| SL2.40ch11 | 170,000    | 8,160,001  | 8,330,000  | 10  | 412    | Gh13 (Unknown)               |            |            |            |         |
| SL2.40ch11 | 70,000     | 8,450,001  | 8,520,000  | 0   | 107    | Gh13 and Heinz (unknown)     |            |            |            |         |
| SL2.40ch11 | 100,000    | 9,930,001  | 10,030,000 | 6   | 188    | Gh13 (Unknown)               |            |            |            |         |
| SL2.40ch11 | 11,760,000 | 23,180,001 | 34,940,000 | 162 | 49,402 | Gh13 (S. pimpinellifolium)   | 8,163,278  | 25,080,735 | 16,917,457 | 92 (12) |
| SL2.40ch11 |            |            |            |     |        |                              | 34,946,763 | 40,370,165 | 5,423,402  | 49 (3)  |
| SL2.40ch11 | 230,000    | 42,900,001 | 43,130,000 | 23  | 423    | Gh13 and Heinz (unknown)     |            |            |            |         |
| SL2.40ch11 | 4,490,000  | 43,180,001 | 47,670,000 | 172 | 21,080 | Gh13 (S. pimpinellifolium)   |            |            |            |         |
| SL2.40ch11 | 60,000     | 48,470,001 | 48,530,000 | 4   | 192    | Gh13 (Unknown)               |            |            |            |         |
| SL2.40ch11 | 70,000     | 48,580,001 | 48,650,000 | 3   | 154    | Gh13 (Unknown)               |            |            |            |         |
| SL2.40ch11 | 130,000    | 48,810,001 | 48,940,000 | 11  | 213    | Gh13 (Unknown)               | 48,827,340 | 49,276,373 | 449,033    | 44 (2)  |
| SL2.40ch11 | 60,000     | 50,590,001 | 50,650,000 | 4   | 144    | Gh13 (Unknown)               | 50,619,142 | 50,643,804 | 24,662     | 3 (0)   |
| SL2.40ch11 | 60,000     | 51,090,001 | 51,150,000 | 3   | 153    | Gh13 (Unknown)               |            |            |            |         |
| SL2.40ch11 | 290,000    | 51,930,001 | 52,220,000 | 39  | 1077   | Gh13 (Unknown)               | 51,935,919 | 52,154,898 | 218,979    | 36 (7)  |
| SL2.40ch12 |            |            |            |     |        |                              | 3,977,225  | 4,038,812  | 61,587     | 5 (0)   |
| SL2.40ch12 | 140,000    | 4,280,001  | 4,420,000  | 13  | 287    | Gh13 and Heinz (unknown)     |            |            |            |         |
| SL2.40ch12 | 100,000    | 4,600,001  | 4,700,000  | 7   | 508    | Gh13 (S. pimpinellifolium)   | 4,638,580  | 5,069,448  | 430,868    | 3 (2)   |
| SL2.40ch12 | 100,000    | 4,950,001  | 5,050,000  | 6   | 328    | Gh13 (S. pimpinellifolium)   |            |            |            |         |
| SL2.40ch12 | 190,000    | 5,100,001  | 5,290,000  | 9   | 553    | Gh13 (S. pimpinellifolium)   | 5,158,348  | 6,682,212  | 1,523,864  | 5 (12)  |
| SL2.40ch12 | 180,000    | 8,220,001  | 8,400,000  | 0   | 153    | Gh13 and Heinz (unknown)     |            |            |            |         |
| SL2.40ch12 | 170,000    | 13,450,001 | 13,620,000 | 0   | 135    | Gh13 and Heinz (unknown)     |            |            |            |         |
| SL2.40ch12 | 220,000    | 16,080,001 | 16,300,000 | 3   | 617    | Gh13 and Heinz (unknown)     |            |            |            |         |
| SL2.40ch12 | 180,000    | 18,480,001 | 18,660,000 | 1   | 159    | Gh13 and Heinz (unknown)     |            |            |            |         |
| SL2.40ch12 | 330,000    | 22,540,001 | 22,870,000 | 4   | 1,367  | Gh13 and Heinz (unknown)     |            |            |            |         |

|                  |                   |            |               |              |                |                          |            |            |                   |            |
|------------------|-------------------|------------|---------------|--------------|----------------|--------------------------|------------|------------|-------------------|------------|
| SL2.40ch12       | 200,000           | 26,790,001 | 26,990,000    | 0            | 191            | Gh13 and Heinz (unknown) |            |            |                   |            |
| SL2.40ch12       | 230,000           | 27,710,001 | 27,940,000    | 0            | 222            | Gh13 and Heinz (unknown) |            |            |                   |            |
| SL2.40ch12       | 130,000           | 33,890,001 | 34,020,000    | 5            | 133            | Gh13 and Heinz (unknown) |            |            |                   |            |
| SL2.40ch12       | 120,000           | 34,900,001 | 35,020,000    | 2            | 136            | Gh13 and Heinz (unknown) |            |            |                   |            |
| SL2.40ch12       | 90,000            | 36,610,001 | 36,700,000    | 1            | 85             | Gh13 and Heinz (unknown) |            |            |                   |            |
| SL2.40ch12       | 120,000           | 37,200,001 | 37,320,000    | 0            | 122            | Gh13 and Heinz (unknown) |            |            |                   |            |
| SL2.40ch12       | 100,000           | 37,780,001 | 37,880,000    | 0            | 96             | Gh13 and Heinz (unknown) |            |            |                   |            |
| SL2.40ch12       | 290,000           | 38,160,001 | 38,450,000    | 5            | 307            | Gh13 and Heinz (unknown) |            |            |                   |            |
| SL2.40ch12       | 170,000           | 41,690,001 | 41,860,000    | 0            | 145            | Gh13 and Heinz (unknown) |            |            |                   |            |
| SL2.40ch12       | 110,000           | 42,190,001 | 42,300,000    | 1            | 92             | Gh13 and Heinz (unknown) |            |            |                   |            |
| SL2.40ch12       | 380,000           | 42,730,001 | 43,110,000    | 17           | 358            | Gh13 and Heinz (unknown) |            |            |                   |            |
| SL2.40ch12       | 60,000            | 43,720,001 | 43,780,000    | 3            | 71             | Heinz (unknown)          |            |            |                   |            |
| SL2.40ch12       | 330,000           | 43,830,001 | 44,160,000    | 8            | 1,711          | Gh13 and Heinz (unknown) |            |            |                   |            |
| SL2.40ch12       | 70,000            | 46,950,001 | 47,020,000    | 3            | 218            | Gh13 and Heinz (unknown) | 45,650,254 | 47,221,911 | 1,571,657         | 6 (8)      |
| SL2.40ch12       | 80,000            | 50,560,001 | 50,640,000    | 1            | 76             | Gh13 and Heinz (unknown) |            |            |                   |            |
| SL2.40ch12       | 250,000           | 50,690,001 | 50,940,000    | 0            | 205            | Gh13 and Heinz (unknown) |            |            |                   |            |
| SL2.40ch12       | 50,000            | 52,270,001 | 52,320,000    | 0            | 502            | Gh13 and Heinz (unknown) |            |            |                   |            |
| SL2.40ch12       | 170,000           | 54,070,001 | 54,240,000    | 2            | 829            | Gh13 and Heinz (unknown) |            |            |                   |            |
| SL2.40ch12       | 70,000            | 55,610,001 | 55,680,000    | 2            | 172            | Gh13 and Heinz (unknown) |            |            |                   |            |
| SL2.40ch12       | 80,000            | 56,390,001 | 56,470,000    | 0            | 77             | Gh13 and Heinz (unknown) |            |            |                   |            |
| SL2.40ch12       | 190,000           | 57,840,001 | 58,030,000    | 0            | 160            | Gh13 and Heinz (unknown) |            |            |                   |            |
| SL2.40ch12       | 160,000           | 59,150,001 | 59,310,000    | 0            | 134            | Gh13 and Heinz (unknown) |            |            |                   |            |
| SL2.40ch12       | 350,000           | 61,390,001 | 61,740,000    | 5            | 484            | Gh13 and Heinz (unknown) |            |            |                   |            |
| SL2.40ch12       |                   |            |               |              |                |                          | 62,436,776 | 63,147,538 | 710,762           | 8 (15)     |
| <b>coverage:</b> | <b>49,420,000</b> |            | <b>genes:</b> | <b>2,326</b> | <b>171,711</b> |                          |            |            | <b>96,762,980</b> | <b>968</b> |
